# Supplementary material for: BP-M345 as a Basis for the Discovery of New Diarylpentanoids with Promising Antimitotic Activity
Source: MDPI journal article supplement (doi:10.3390/ijms25031691), 2024-01-30
Supplement: s1 [file s1]

# BP-M345 as a Basis for the Discovery of New Diarylpentanoids with Promising Antimitotic Activity

Joana Moreira <sup>1,2,†</sup>, Patrícia M. A. Silva <sup>3,4,†</sup>, Eliseba Castro <sup>3</sup>, Lucília Saraiva <sup>5</sup>, Madalena Pinto <sup>1,2</sup>, Hassan Bousbaa <sup>3,\*</sup> and Honorina Cidade <sup>1,2,\*</sup>

<sup>1</sup> Laboratory of Organic and Pharmaceutical Chemistry, Department of Chemical Sciences, Faculty of Pharmacy, University of Porto, Rua de Jorge Viterbo Ferreira 228, 4050-313 Porto, Portugal

<sup>2</sup> Interdisciplinary Centre of Marine and Environmental Research (CIIMAR), University of Porto, Edifício do Terminal de Cruzeiros do Porto de Leixões, Avenida General Norton de Matos, S/N, 4450-208 Matosinhos, Portugal

<sup>3</sup> UNIPRO—Oral Pathology and Rehabilitation Research Unit, University Institute of Health Sciences (IUCS), Cooperativa de Ensino Superior Politécnico e Universitário (CESPU), Rua Central de Gandra 1317, 4585-116 Gandra, Portugal

<sup>4</sup> 1H-TOXRUN—One Health Toxicology Research Unit, University Institute of Health Sciences (IUCS), Cooperativa de Ensino Superior Politécnico e Universitário (CESPU), Rua Central de Gandra 1317, 4585-116 Gandra, Portugal

<sup>5</sup> LAQV/REQUIMTE, Laboratory of Microbiology, Department of Biological Sciences, Faculty of Pharmacy, University of Porto, Rua Jorge Viterbo Ferreira 228, 4050-313 Porto, Portugal

\* Correspondence: hassan.bousbaa@iucs.cespu.pt (H.B.); hcidade@ff.up.pt (H.C.); Tel.: +351-224157186 (H.B.); +351-220428688 (H.C.)

† These authors contributed equally to this work.

## Table of Contents

|                                           |    |
|-------------------------------------------|----|
| List of Figures .....                     | 3  |
| Experimental of compounds of group A..... | 5  |
| NMR spectra .....                         | 7  |
| HRMS spectra.....                         | 20 |
| HPLC chromatograms .....                  | 28 |

## List of Figures

|                                                                                                     |    |
|-----------------------------------------------------------------------------------------------------|----|
| <b>Figure S1.</b> $^1\text{H}$ and $^{13}\text{C}$ NMR spectra of compound <b>BP-M345 (5)</b> ..... | 7  |
| <b>Figure S2.</b> $^1\text{H}$ and $^{13}\text{C}$ NMR spectra of compound <b>6</b> .....           | 8  |
| <b>Figure S3.</b> $^1\text{H}$ and $^{13}\text{C}$ NMR spectra of compound <b>7</b> .....           | 9  |
| <b>Figure S4.</b> $^1\text{H}$ and $^{13}\text{C}$ NMR spectra of compound <b>8</b> .....           | 10 |
| <b>Figure S5.</b> $^1\text{H}$ and $^{13}\text{C}$ NMR spectra of compound <b>9</b> .....           | 11 |
| <b>Figure S6.</b> $^1\text{H}$ and $^{13}\text{C}$ NMR spectra of compound <b>10</b> .....          | 12 |
| <b>Figure S7.</b> $^1\text{H}$ and $^{13}\text{C}$ NMR spectra of compound <b>11</b> .....          | 13 |
| <b>Figure S8.</b> $^1\text{H}$ and $^{13}\text{C}$ NMR spectra of compound <b>12</b> .....          | 14 |
| <b>Figure S9.</b> $^1\text{H}$ and $^{13}\text{C}$ NMR spectra of compound <b>13</b> .....          | 15 |
| <b>Figure S10.</b> $^1\text{H}$ and $^{13}\text{C}$ NMR spectra of compound <b>14</b> .....         | 16 |
| <b>Figure S11.</b> $^1\text{H}$ and $^{13}\text{C}$ NMR spectra of compound <b>15</b> .....         | 17 |
| <b>Figure S12.</b> $^1\text{H}$ and $^{13}\text{C}$ NMR spectra of compound <b>16</b> .....         | 18 |
| <b>Figure S13.</b> $^1\text{H}$ and $^{13}\text{C}$ NMR spectra of compound <b>17</b> .....         | 19 |
| <b>Figure S14.</b> HRMS spectrum of compound <b>10</b> .....                                        | 20 |
| <b>Figure S15.</b> HRMS spectrum of compound <b>11</b> .....                                        | 21 |
| <b>Figure S16.</b> HRMS spectrum of compound <b>12</b> .....                                        | 22 |
| <b>Figure S17.</b> HRMS spectrum of compound <b>13</b> .....                                        | 23 |
| <b>Figure S18.</b> HRMS spectrum of compound <b>14</b> .....                                        | 24 |
| <b>Figure S19.</b> HRMS spectrum of compound <b>15</b> .....                                        | 25 |
| <b>Figure S20.</b> HRMS spectrum of compound <b>16</b> .....                                        | 26 |
| <b>Figure S21.</b> HRMS spectrum of compound <b>17</b> .....                                        | 27 |
| <b>Figure S22.</b> HPLC chromatograms of compound <b>6</b> .....                                    | 28 |
| <b>Figure S23.</b> HPLC chromatograms of compound <b>7</b> .....                                    | 29 |
| <b>Figure S24.</b> HPLC chromatograms of compound <b>8</b> .....                                    | 30 |
| <b>Figure S25.</b> HPLC chromatograms of compound <b>9</b> .....                                    | 31 |
| <b>Figure S26.</b> HPLC chromatograms of compound <b>10</b> .....                                   | 32 |
| <b>Figure S27.</b> HPLC chromatograms of compound <b>11</b> .....                                   | 33 |
| <b>Figure S28.</b> HPLC chromatograms of compound <b>12</b> .....                                   | 34 |
| <b>Figure S29.</b> HPLC chromatograms of compound <b>13</b> .....                                   | 35 |

|                                                               |    |
|---------------------------------------------------------------|----|
| <b>Figure S30.</b> HPLC chromatograms of compound <b>14</b> . | 36 |
| <b>Figure S31.</b> HPLC chromatograms of compound <b>15</b> . | 37 |
| <b>Figure S32.</b> HPLC chromatograms of compound <b>16</b> . | 38 |
| <b>Figure S33.</b> HPLC chromatograms of compound <b>17</b> . | 39 |

## Experimental of compounds of group A

An aqueous solution of 40% sodium hydroxide was added to a solution of appropriate ketone (200 mg, 1.72-4.44 mmol, 1 eq.) in methanol until pH 13-14. Then, a solution of 3,4,5-trimethoxybenzaldehyde (1.01-1.10 g, 5.17-10.7 mmol, 3eq.) in methanol was slowly added to the reaction mixture. The reaction was left at room temperature for 2-7 days and was monitored by TLC. After, crushed ice was added to the reaction mixture and neutralized with 5M HCl solution. A precipitate was formed upon cooling to room temperature. This was filtrated, washed with water, and purified as indicated below for the referred compounds.

(1*E*,4*E*)-1,5-bis(3,4,5-trimethoxyphenyl)penta-1,4-dien-3-one (**6**): Purified by crystallization from methanol. Yield: 49% as yellow solid; 99.5% purity; mp 127-129 °C (methanol); <sup>1</sup>H NMR (CDCl<sub>3</sub>, 300.13 MHz) δ: 7.66 (d, *J* = 15.8 Hz, 2H, H-β), 6.98 (d, *J* = 15.8 Hz, 2H, H-α), 6.85 (s, 4H, H-2', -6'), 3.93 (s, 6H, 3', 5'-OCH<sub>3</sub>), 3.90 (s, 3H, 3', 5'-OCH<sub>3</sub>) ppm; <sup>13</sup>C NMR (CDCl<sub>3</sub>, 75.47 MHz) δ: 188.6 (C=O), 153.6 (C-3', -5'), 143.5 (C-β), 140.5 (C-4'), 130.4 (C-1'), 124.9 (C-α), 105.7 (C-2', -6'), 61.2 (4'-OCH<sub>3</sub>), 56.3 (3', 5'-OCH<sub>3</sub>) ppm.

2,5-bis((*E*)-3,4,5-trimethoxybenzylidene)cyclopentan-1-one (**7**): Purified by crystallization from methanol. Yield: 90% as yellow solid; 99.5% purity; mp 203-205 °C (methanol); <sup>1</sup>H NMR (CDCl<sub>3</sub>, 300.13 MHz) δ: 7.52 (sl, 2H, H-1''), 6.84 (s, 4H, H-2', -6'), 3.91 (s, 6H, 3', 5'-OCH<sub>3</sub>), 3.90 (s, 3H, 4'-OCH<sub>3</sub>) 3.14 (sl, 4H, H-3) ppm; <sup>13</sup>C NMR (CDCl<sub>3</sub>, 75.47 MHz) δ: 196.0 (C=O), 153.4 (C-2', -6'), 139.7 (C-4'), 136.2 (C-2), 134.2 (C-1''), 131.5 (C-1'), 61.1 (4'-OCH<sub>3</sub>), 56.3 (3', 5'-OCH<sub>3</sub>), 26.6 (C-3) ppm.

2,6-bis((*E*)-3,4,5-trimethoxybenzylidene)cyclohexan-1-one (**8**): Purified by crystallization from methanol. Yield: 60% as yellow solid; 98.9% purity; mp 196-198 °C (methanol); <sup>1</sup>H NMR (CDCl<sub>3</sub>, 300.13 MHz) δ: 7.72 (sl, 2H, H-1''), 6.71 (s, 4H, H-2', -6'), 3.89 (s, 6H, 3', 5'-OCH<sub>3</sub>), 3.88 (s, 3H, 4'-OCH<sub>3</sub>), 2.95 (td, *J* = 6.2; 2.0 Hz, 4H, H-3), 1.34 (quintet, *J* = 6.0 Hz, 2H, H-4) ppm; <sup>13</sup>C NMR (CDCl<sub>3</sub>, 75.47 MHz) δ: 190.1 (C=O), 153.1 (C-3', -5'), 138.9 (C-4'), 137.3 (C-1''), 135.5 (C-2), 131.6 (C-1'), 108.0 (C-2', -6'), 61.1 (4'-OCH<sub>3</sub>), 56.3 (3', 5'-OCH<sub>3</sub>), 28.6 (C-3), 23.1 (C-4) ppm.

3,5-bis((*Z*)-3,4,5-trimethoxybenzylidene)tetrahydro-4*H*-thiopyran-4-one (**9**): Purified by crystallization from methanol. Yield: 55% as yellow solid; 98.4% purity; mp 219-222 °C (methanol); <sup>1</sup>H NMR (CDCl<sub>3</sub>, 300.13 MHz) δ: 7.71 (sl, 2H, H-1''), 6.63 (s, 4H, H-2', -6'), 3.89 (s, 3H, 4'-OCH<sub>3</sub>), 3.88 (s, 6H, 3', 5'-OCH<sub>3</sub>), 3.95 (sl, 4H, H-3) ppm; <sup>13</sup>C NMR (CDCl<sub>3</sub>, 75.47 MHz) δ: 188.9 (C=O),

153.3 (C-3', -5'), 139.1 (C-4'), 137.3 (C-1''), 133.4 (C-2), 130.7 (C-1'), 107.6 (C-2', -6'), 61.1 (4'-OCH<sub>3</sub>), 56.4 (3', 5'-OCH<sub>3</sub>), 30.2 (C-3,) ppm.

# NMR spectra

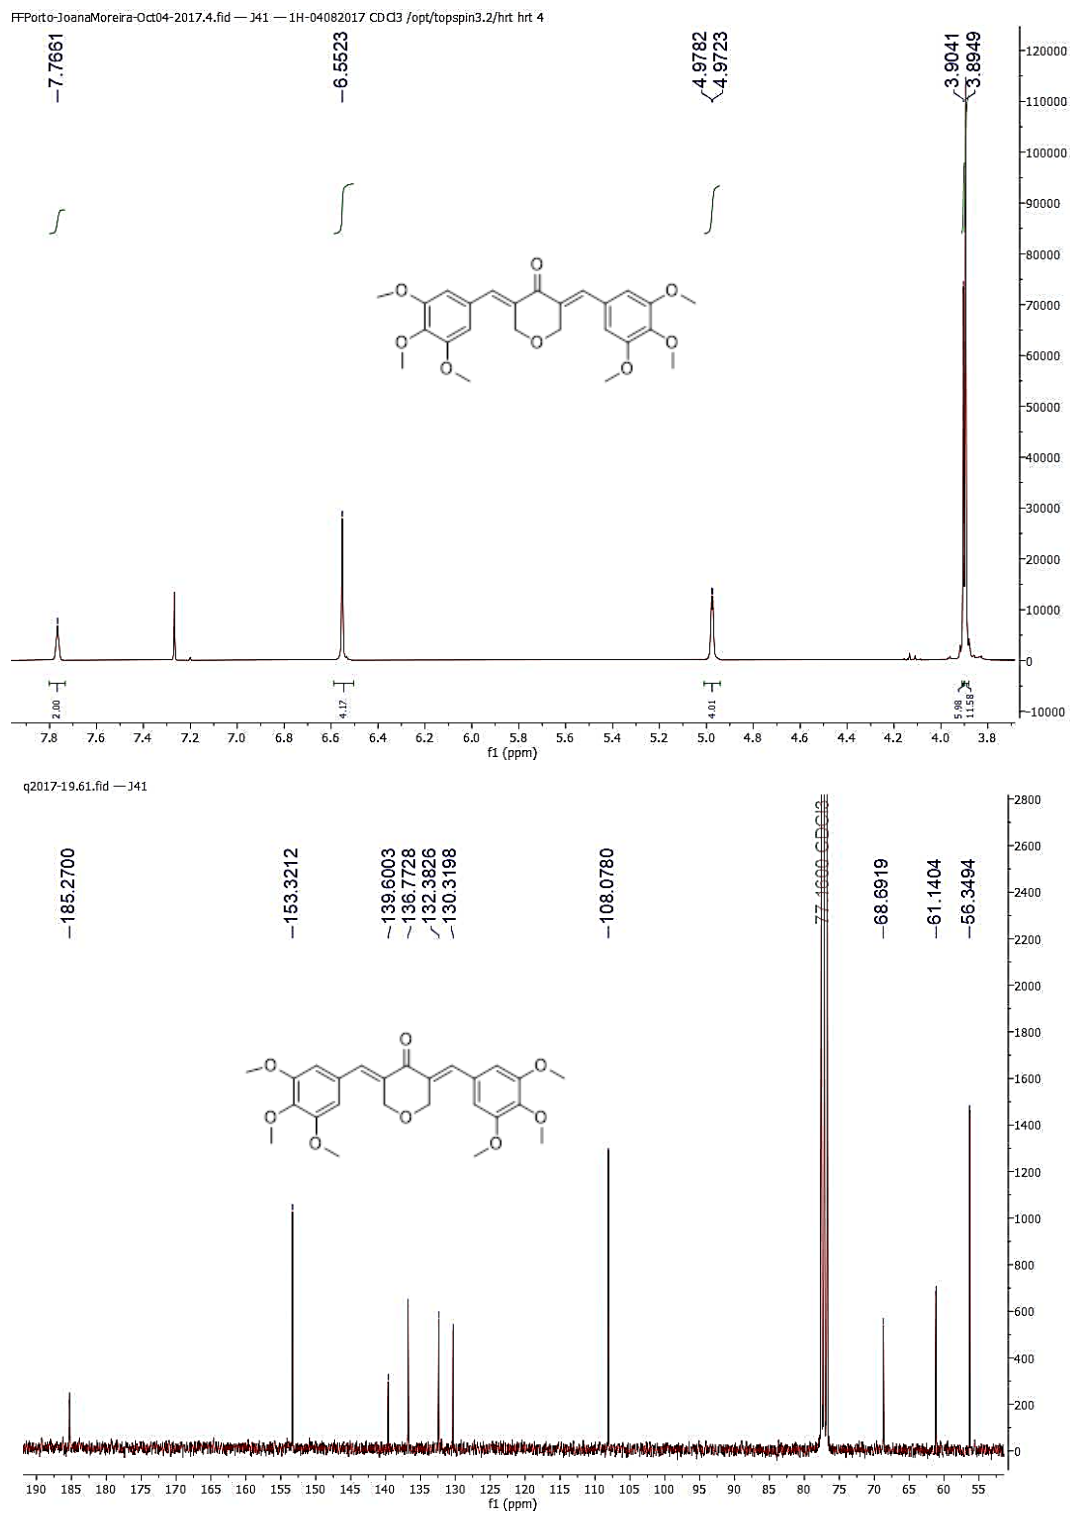

Figure S1. <sup>1</sup>H and <sup>13</sup>C NMR spectra of compound BP-M345 (5).

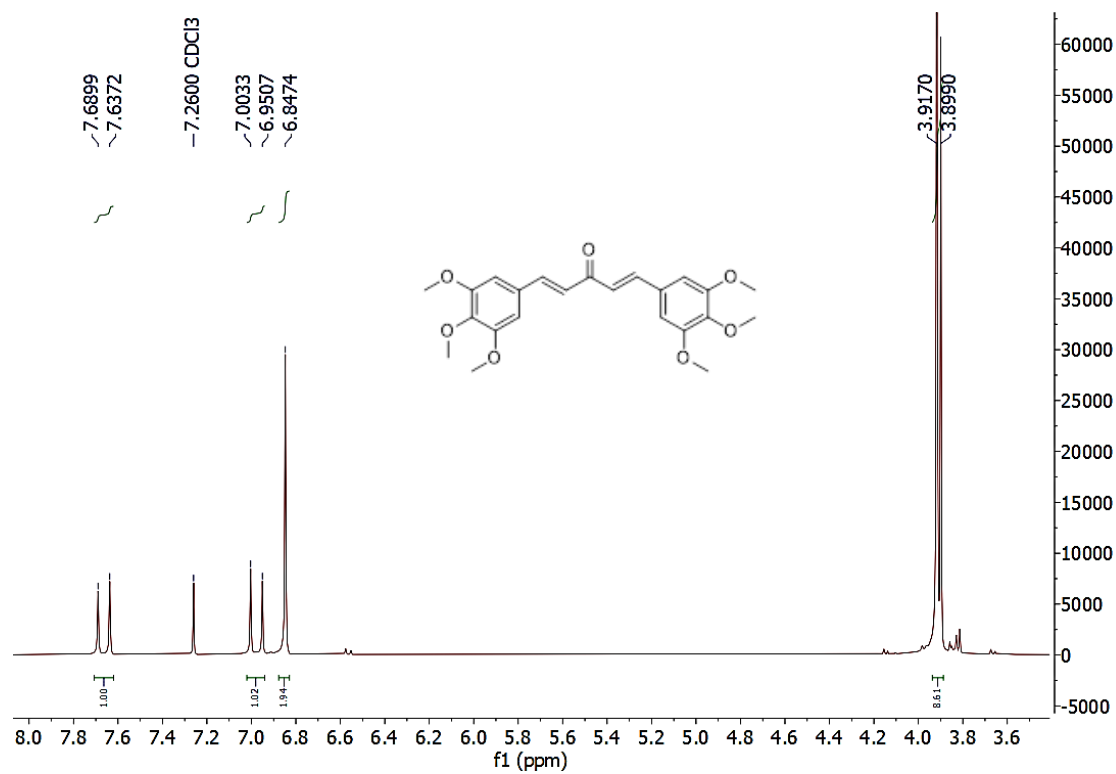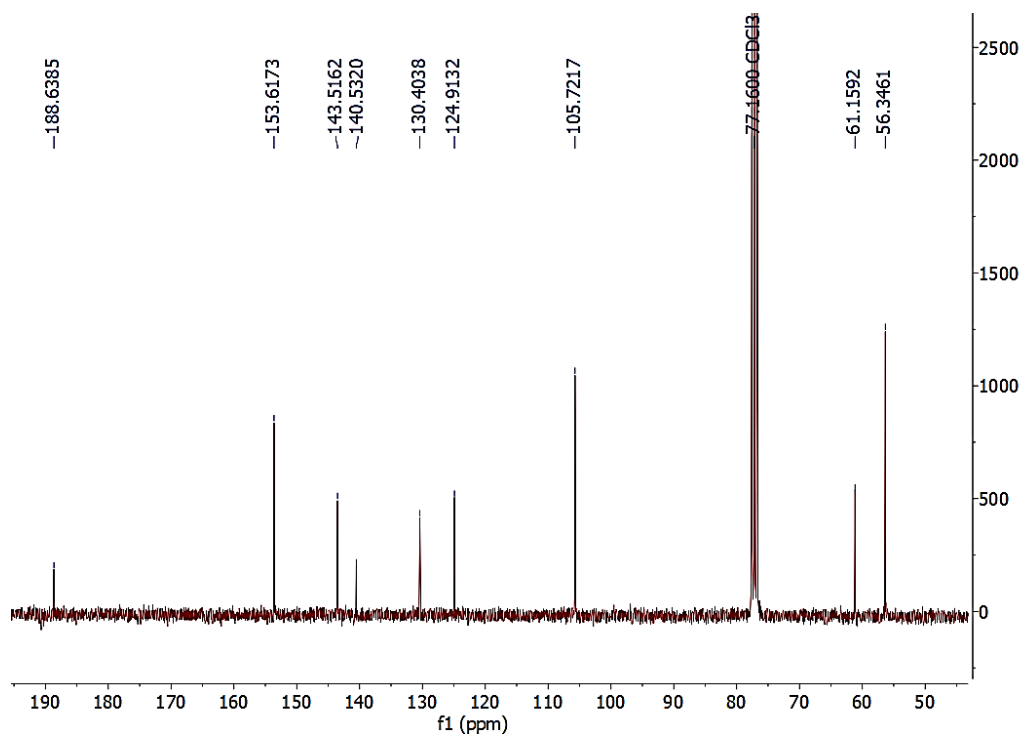

Figure S2. <sup>1</sup>H and <sup>13</sup>C NMR spectra of compound 6.



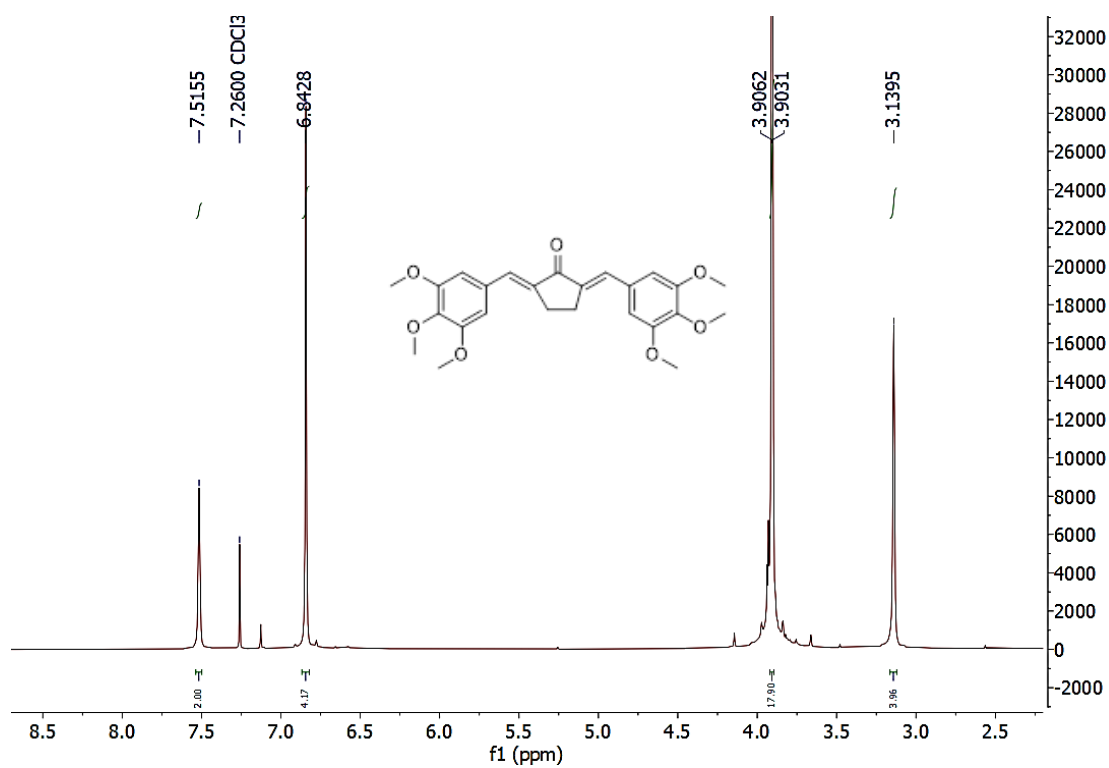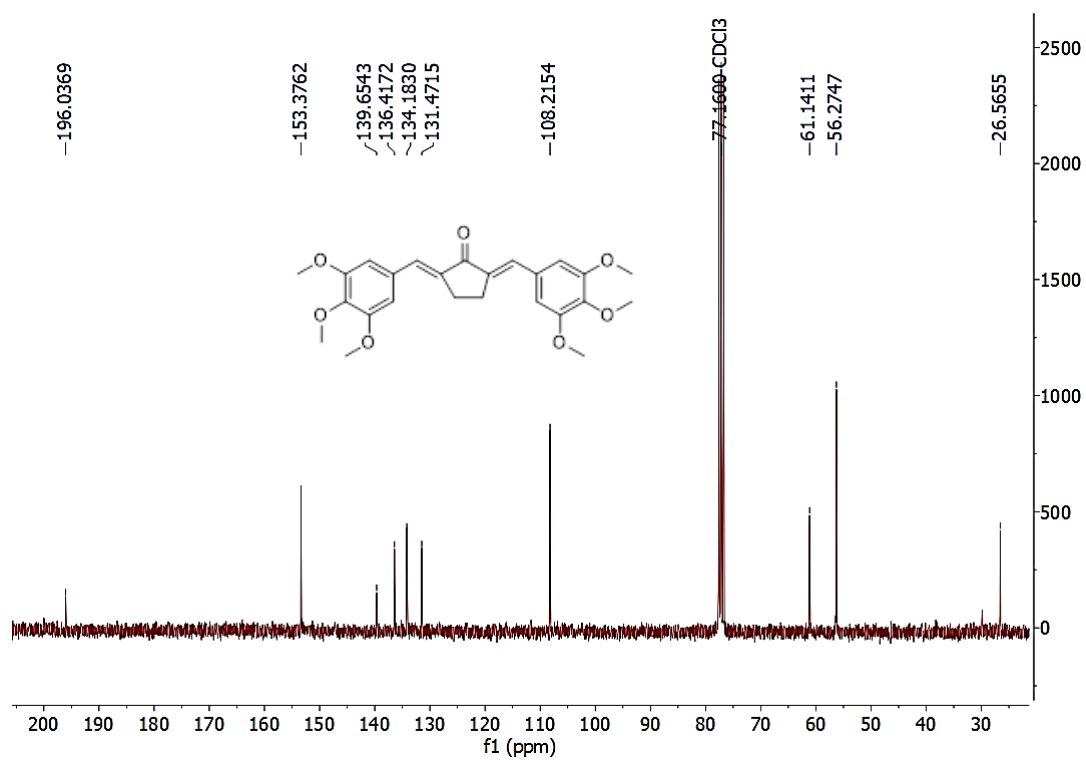

**Figure S3.** <sup>1</sup>H and <sup>13</sup>C NMR spectra of compound 7.

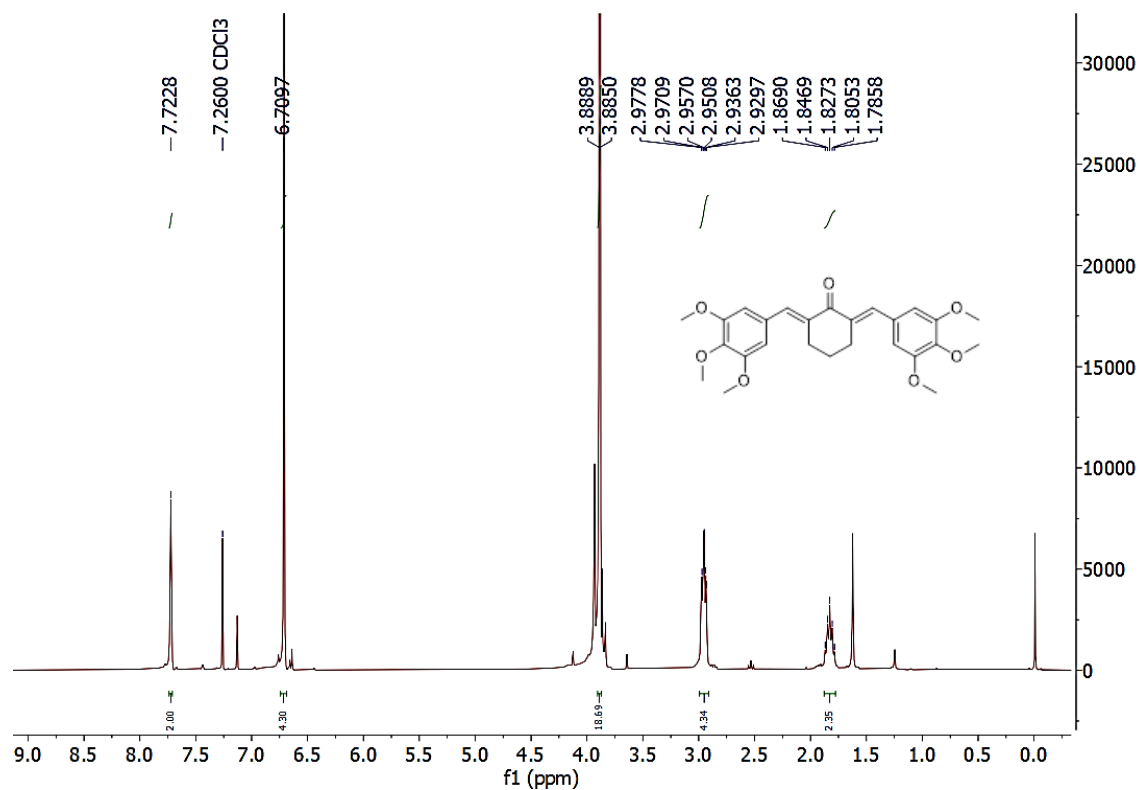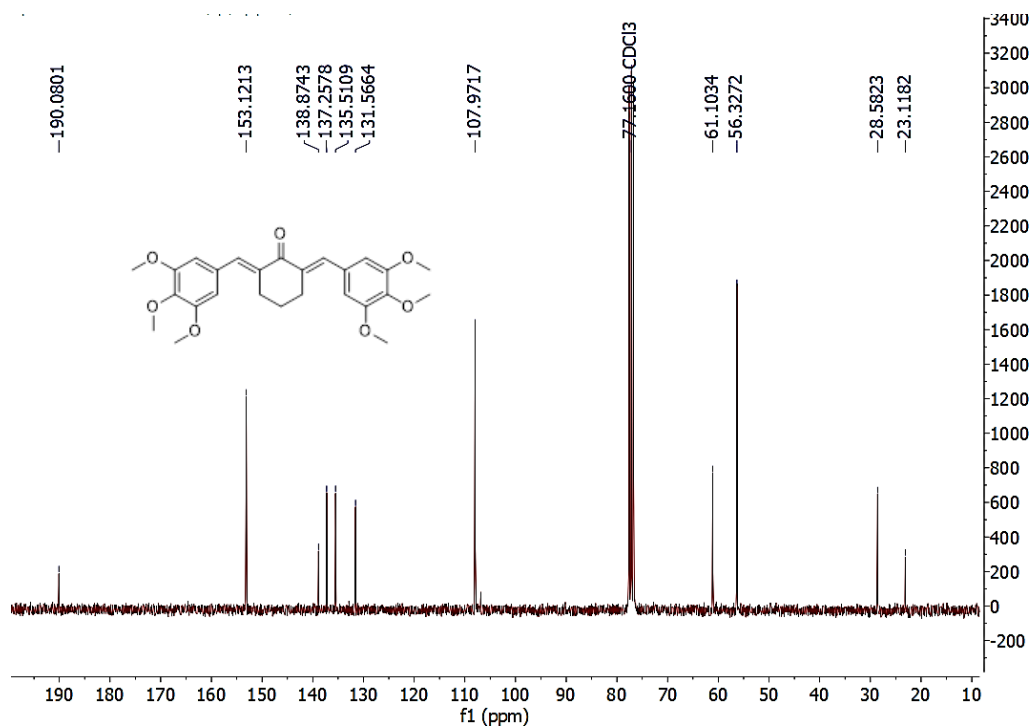

**Figure S4.** <sup>1</sup>H and <sup>13</sup>C NMR spectra of compound 8.

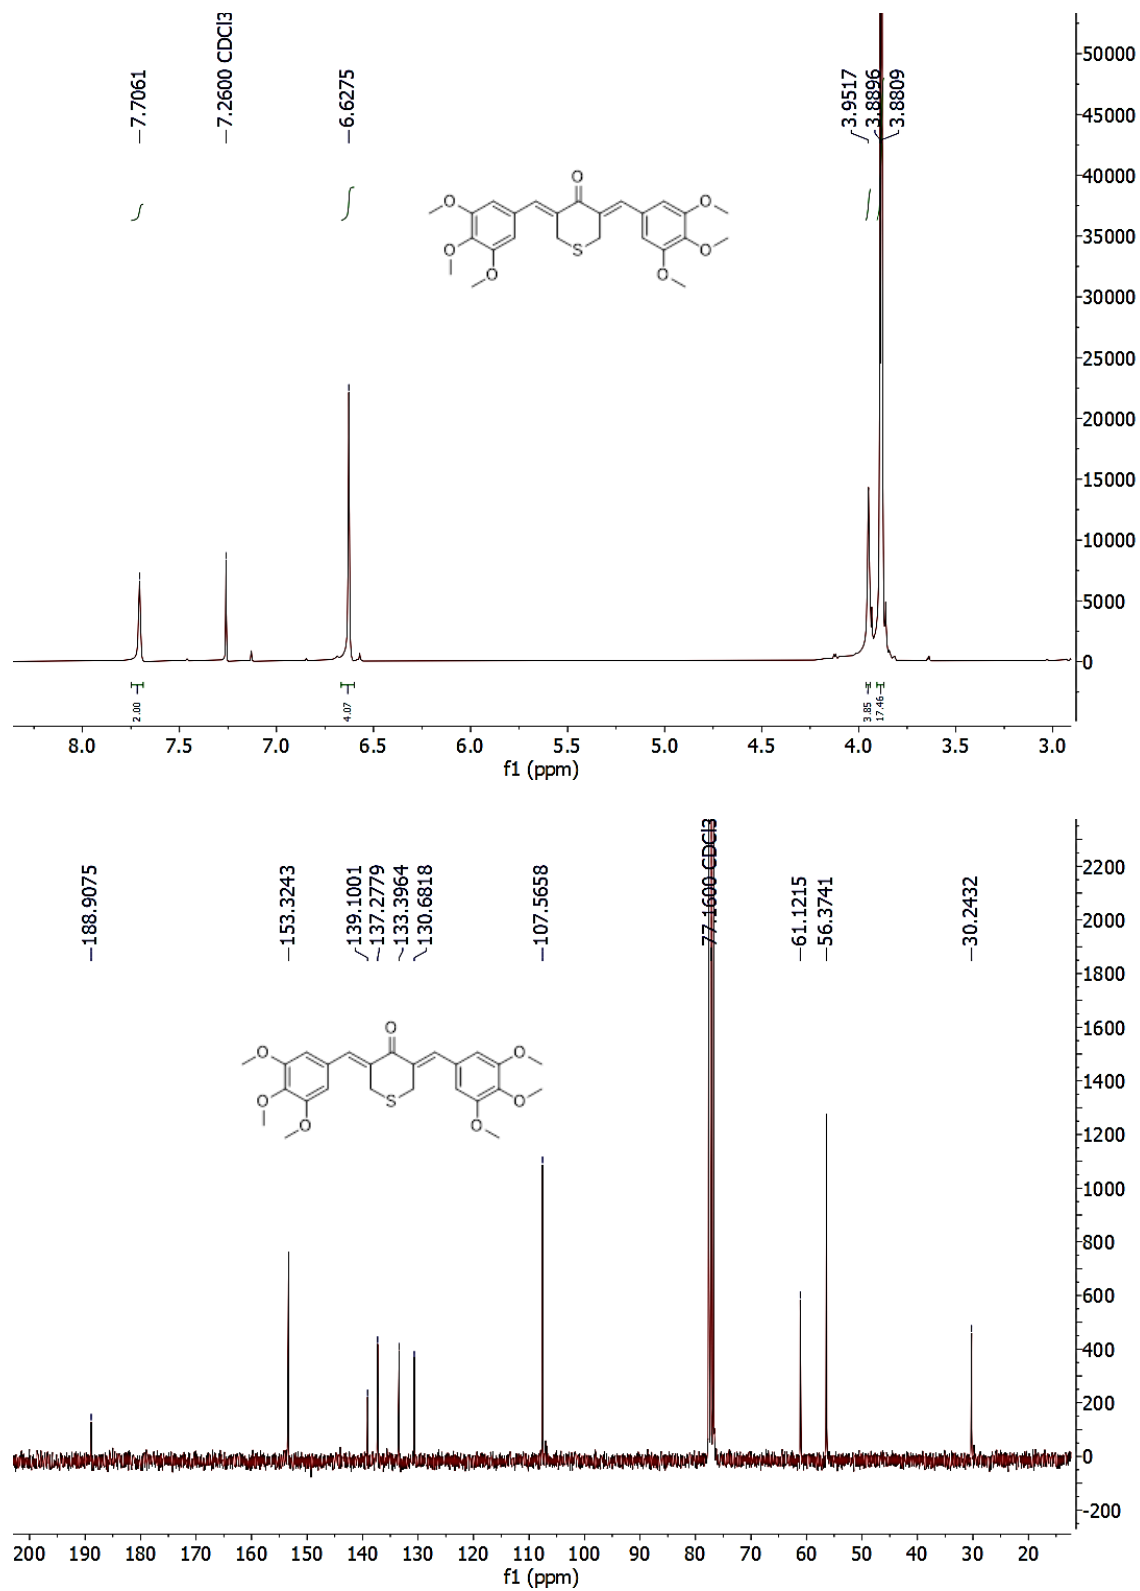

**Figure S5.** <sup>1</sup>H and <sup>13</sup>C NMR spectra of compound **9**.

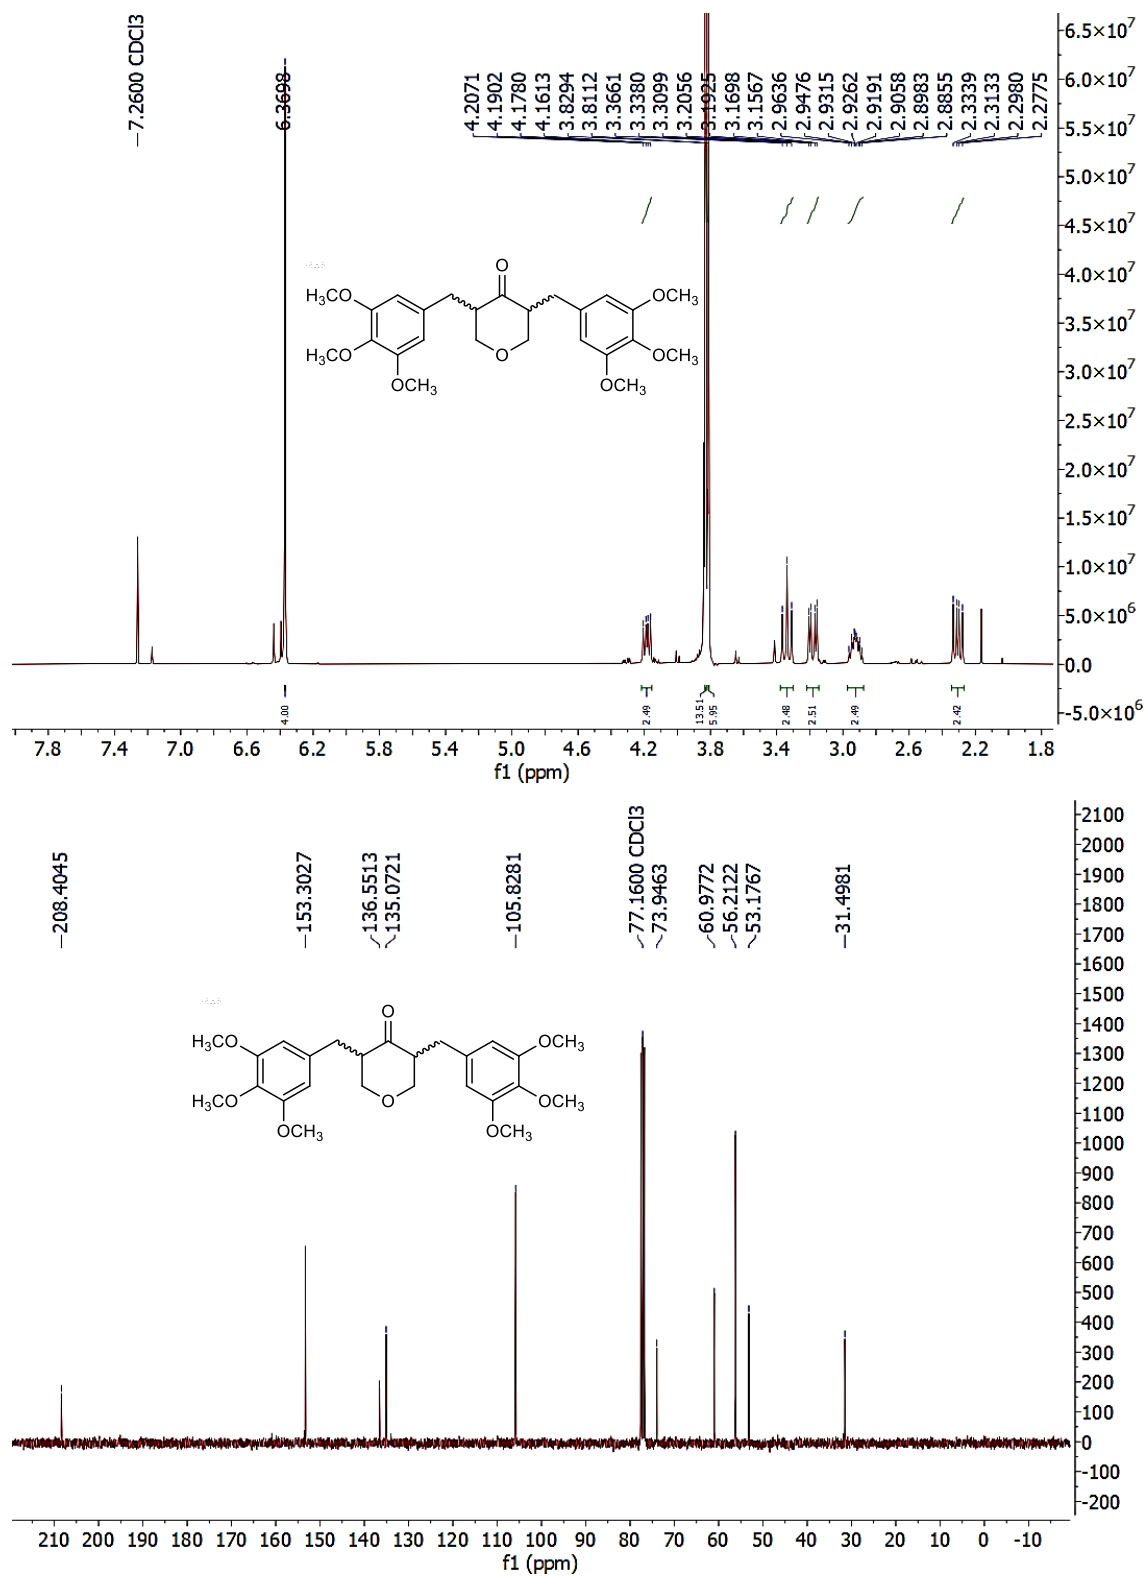

**Figure S6.** <sup>1</sup>H and <sup>13</sup>C NMR spectra of compound 10.

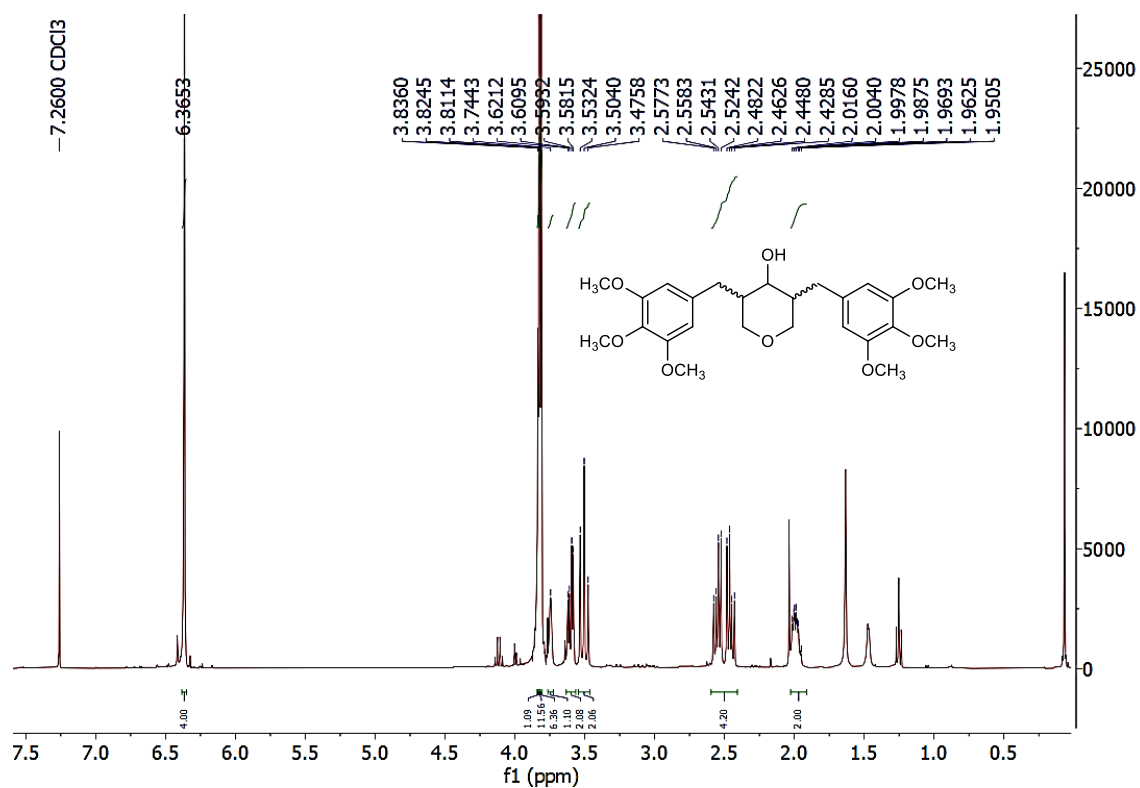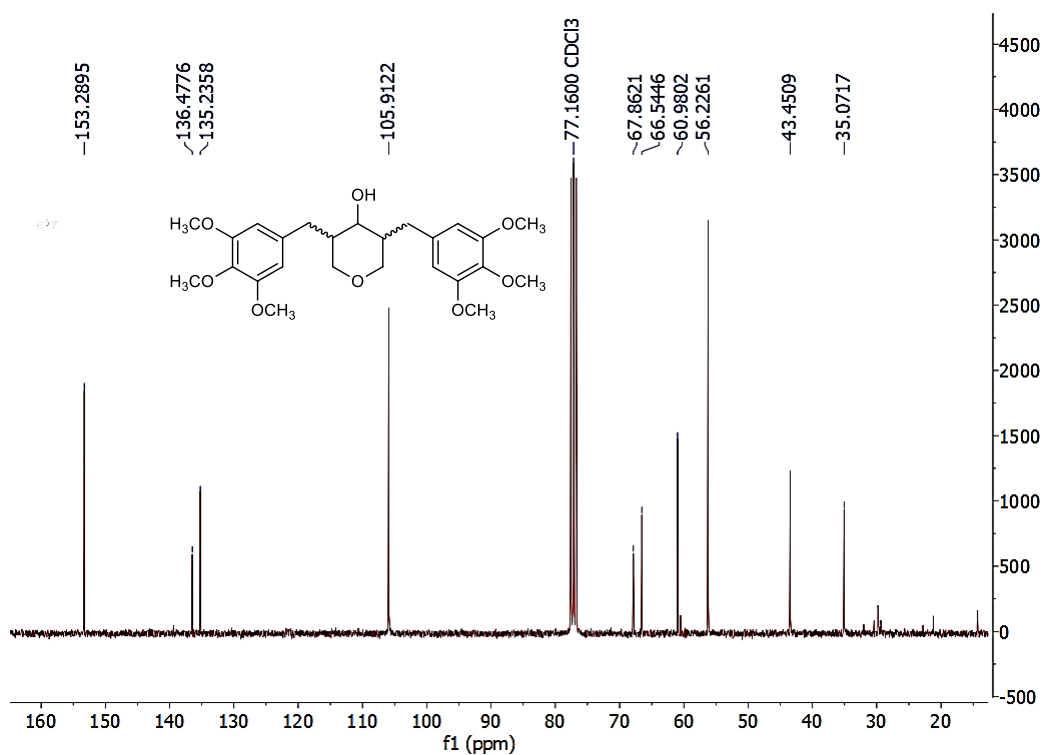

Figure S7. <sup>1</sup>H and <sup>13</sup>C NMR spectra of compound 11.

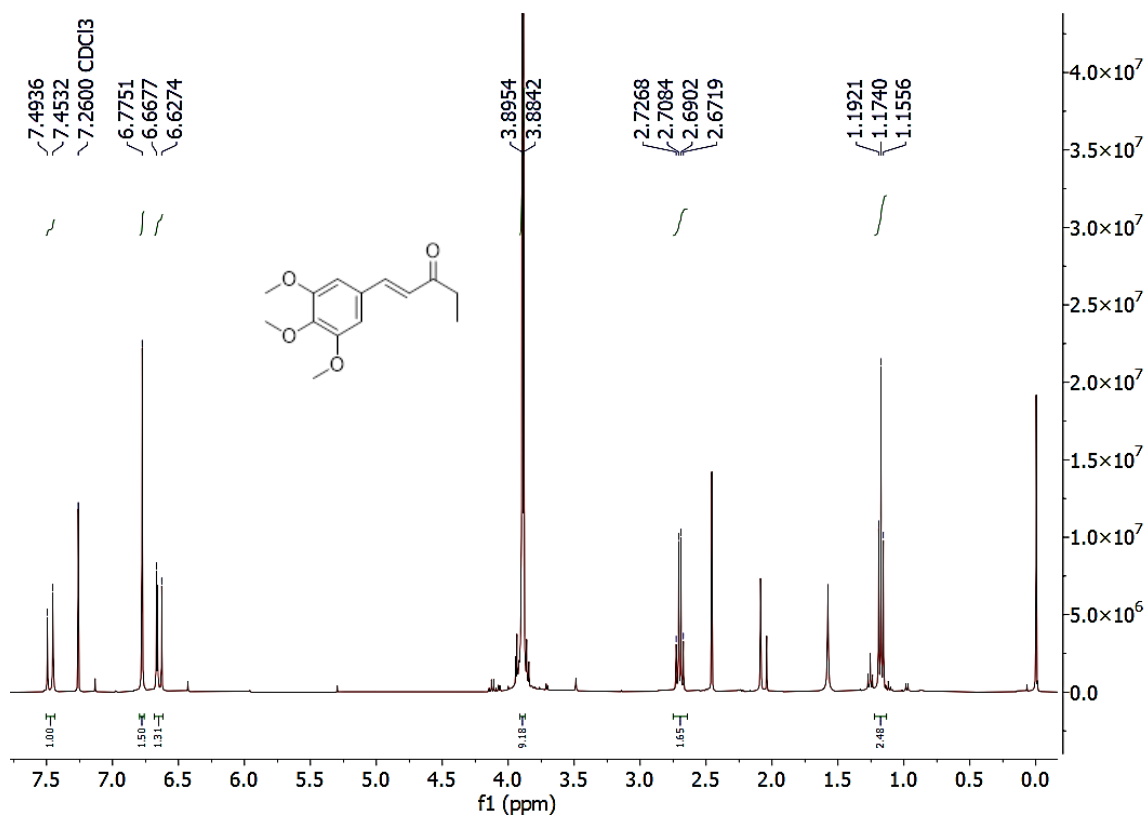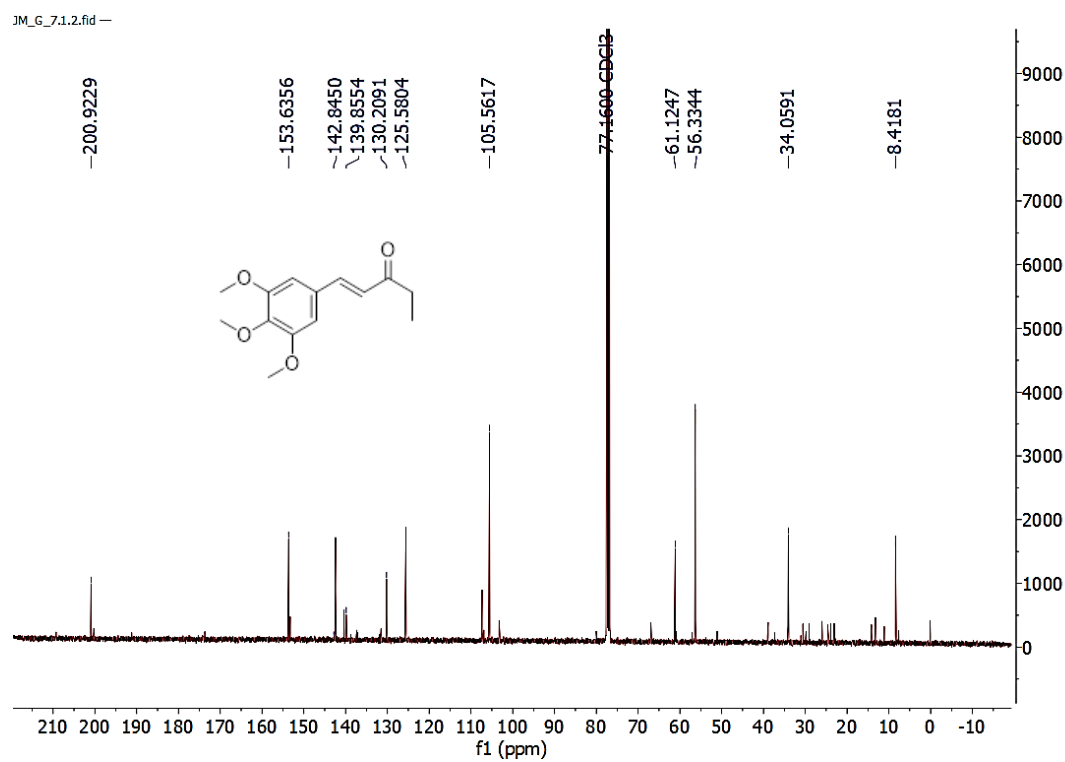

**Figure S8.** <sup>1</sup>H and <sup>13</sup>C NMR spectra of compound 12.

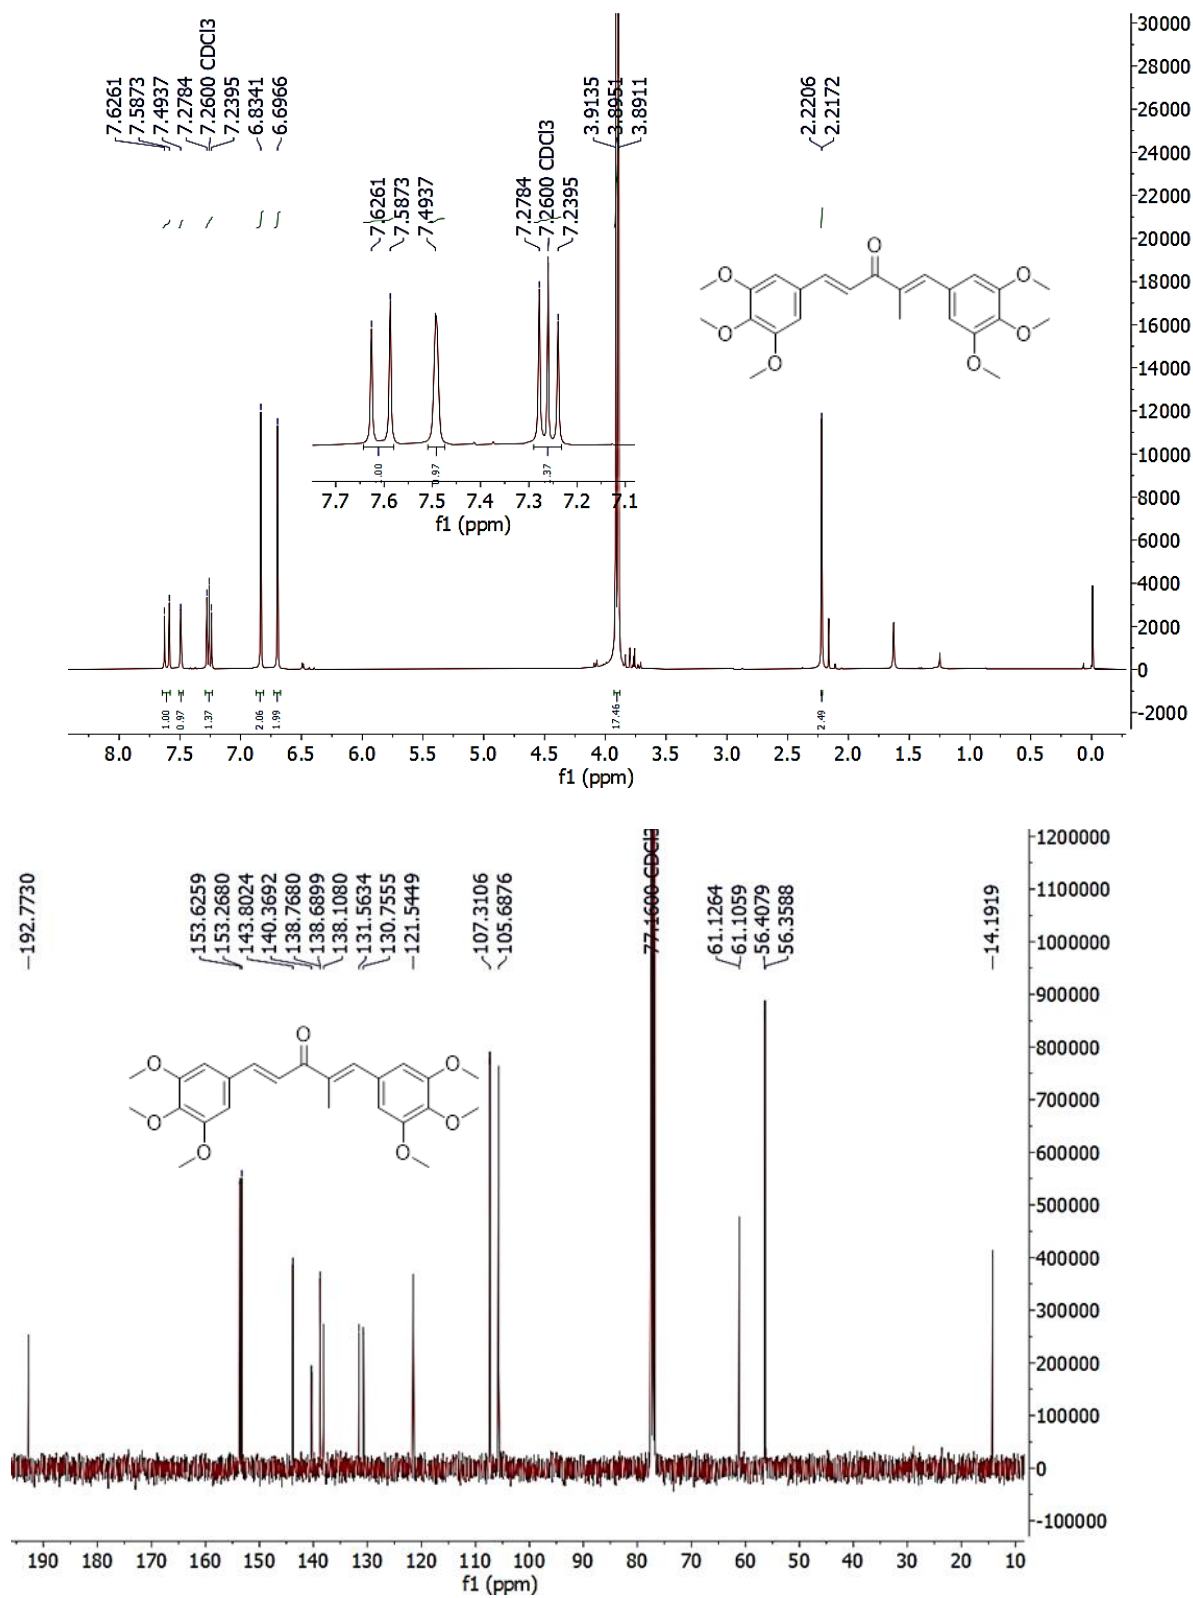

**Figure S9.** <sup>1</sup>H and <sup>13</sup>C NMR spectra of compound 13.

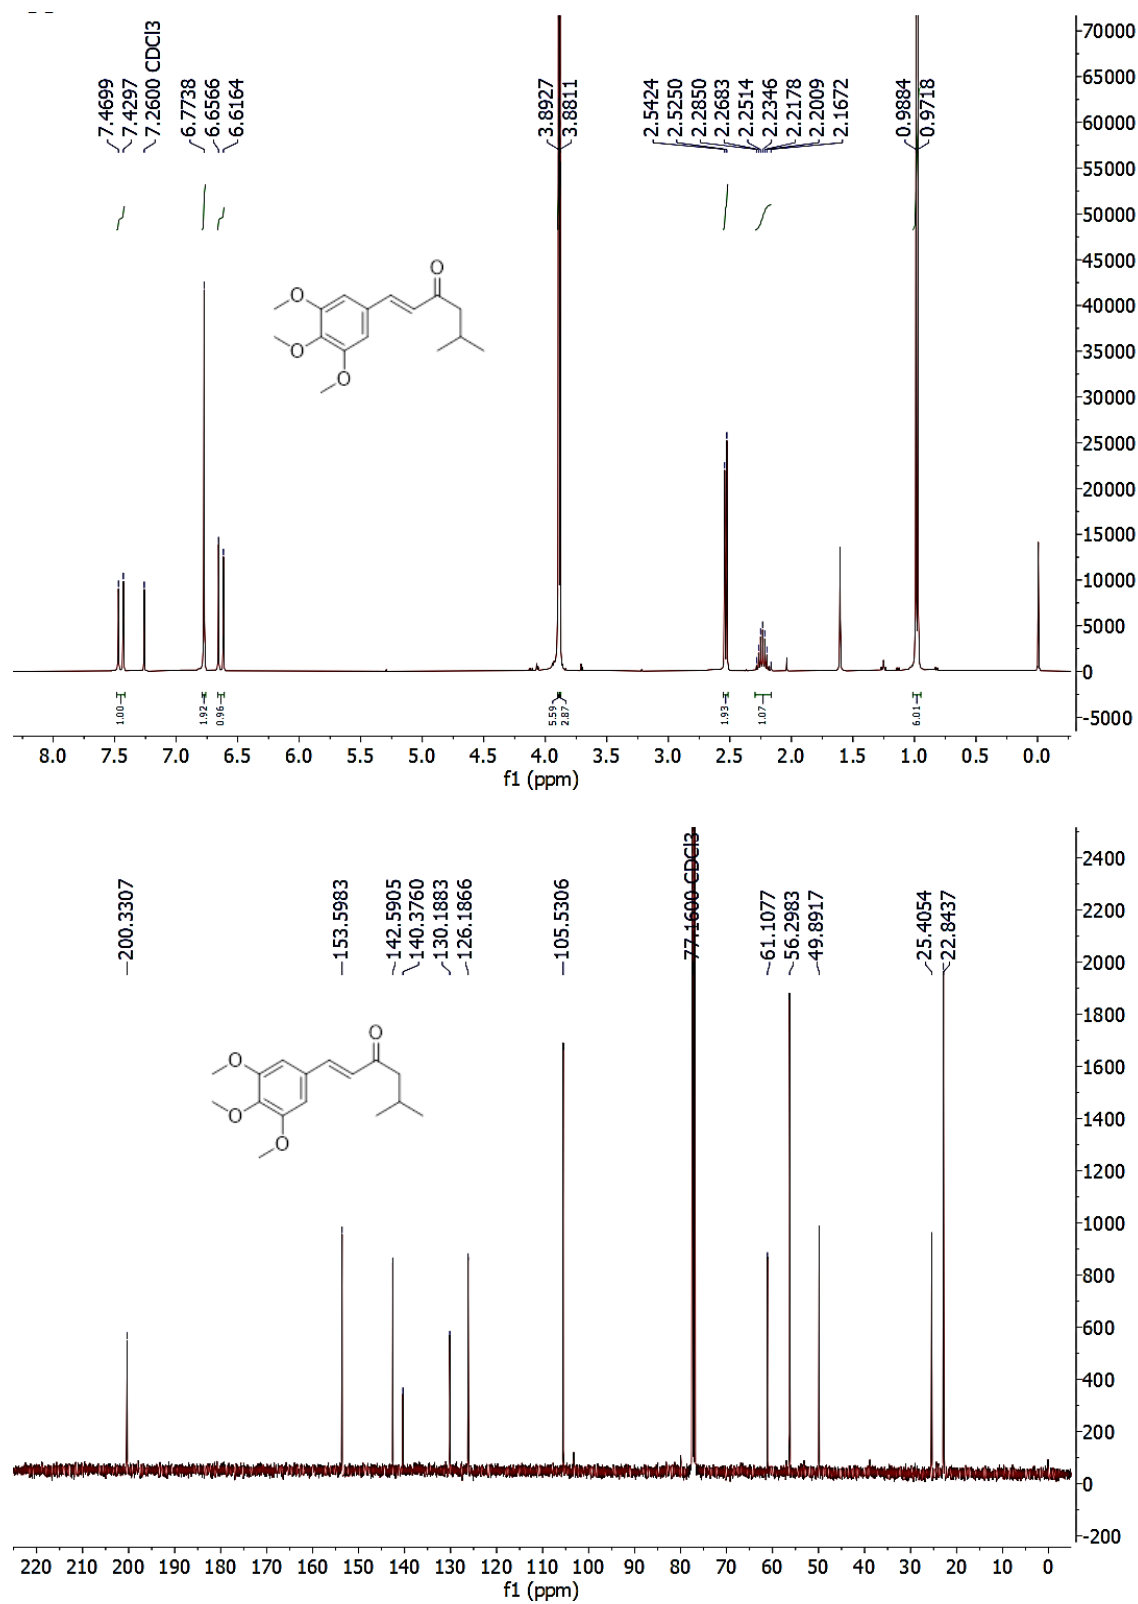

**Figure S10.** <sup>1</sup>H and <sup>13</sup>C NMR spectra of compound **14**.



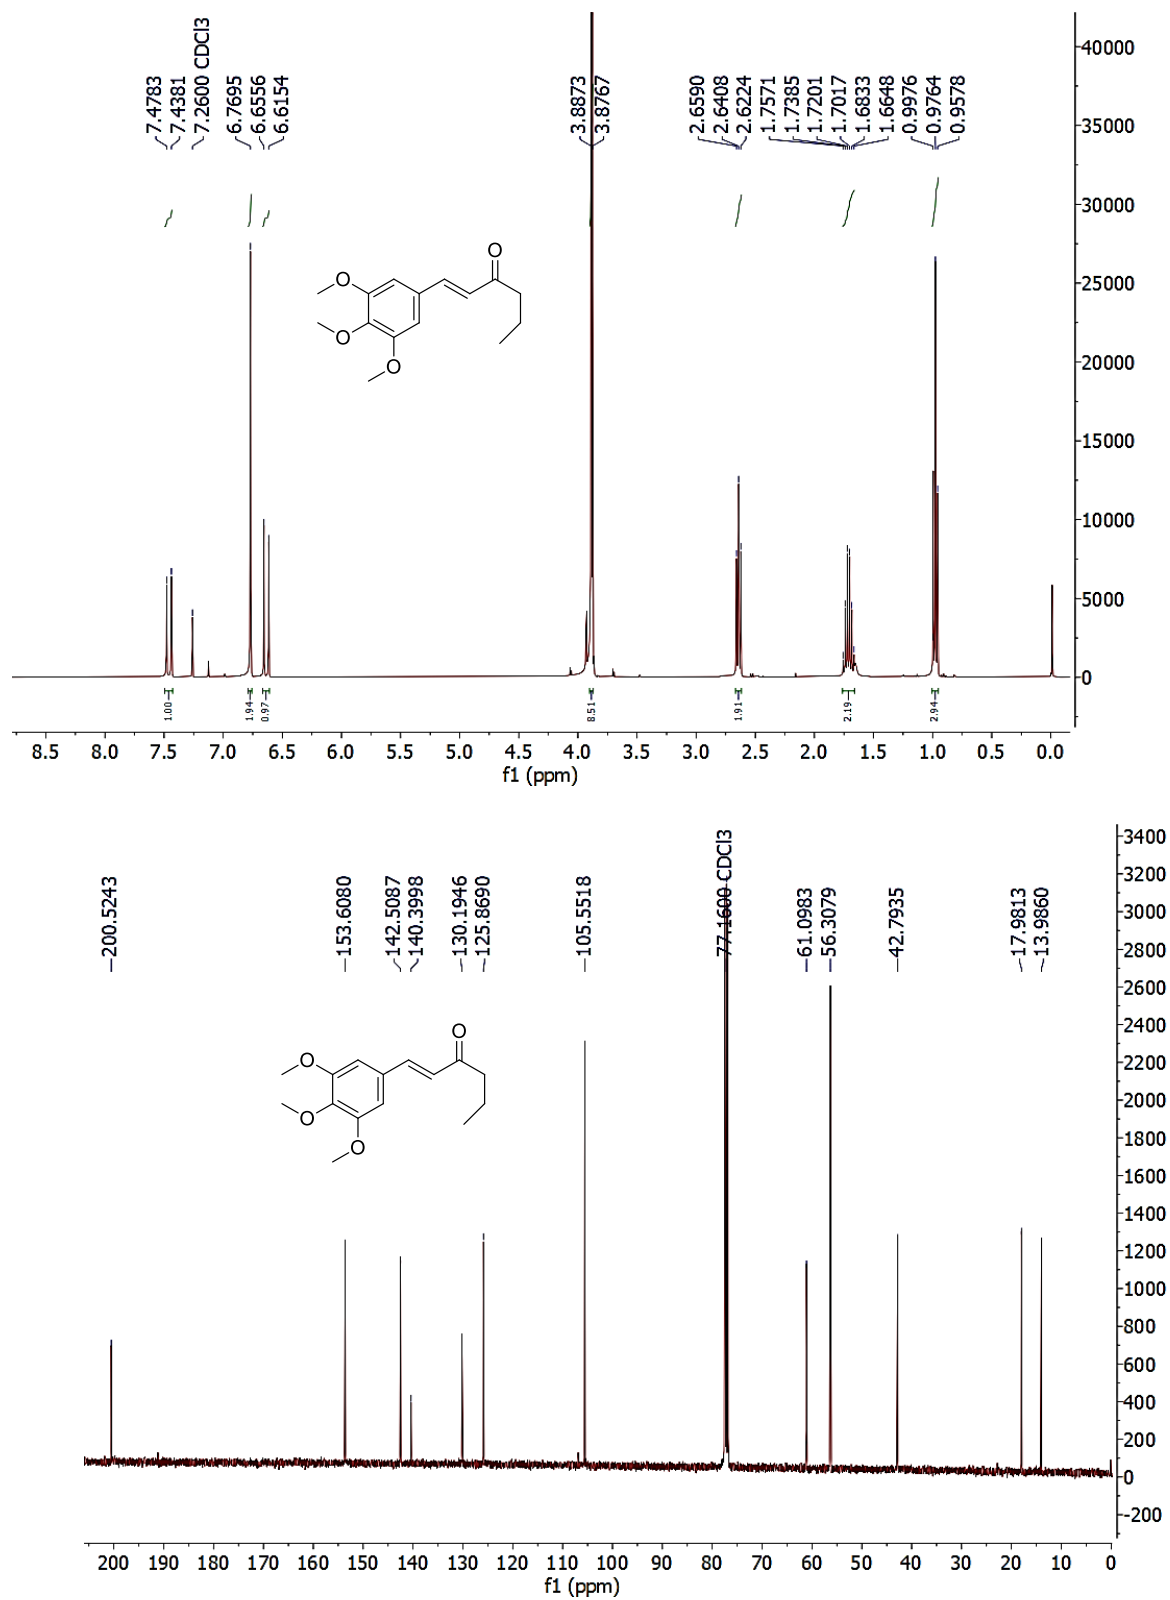

**Figure S11.** <sup>1</sup>H and <sup>13</sup>C NMR spectra of compound 15.

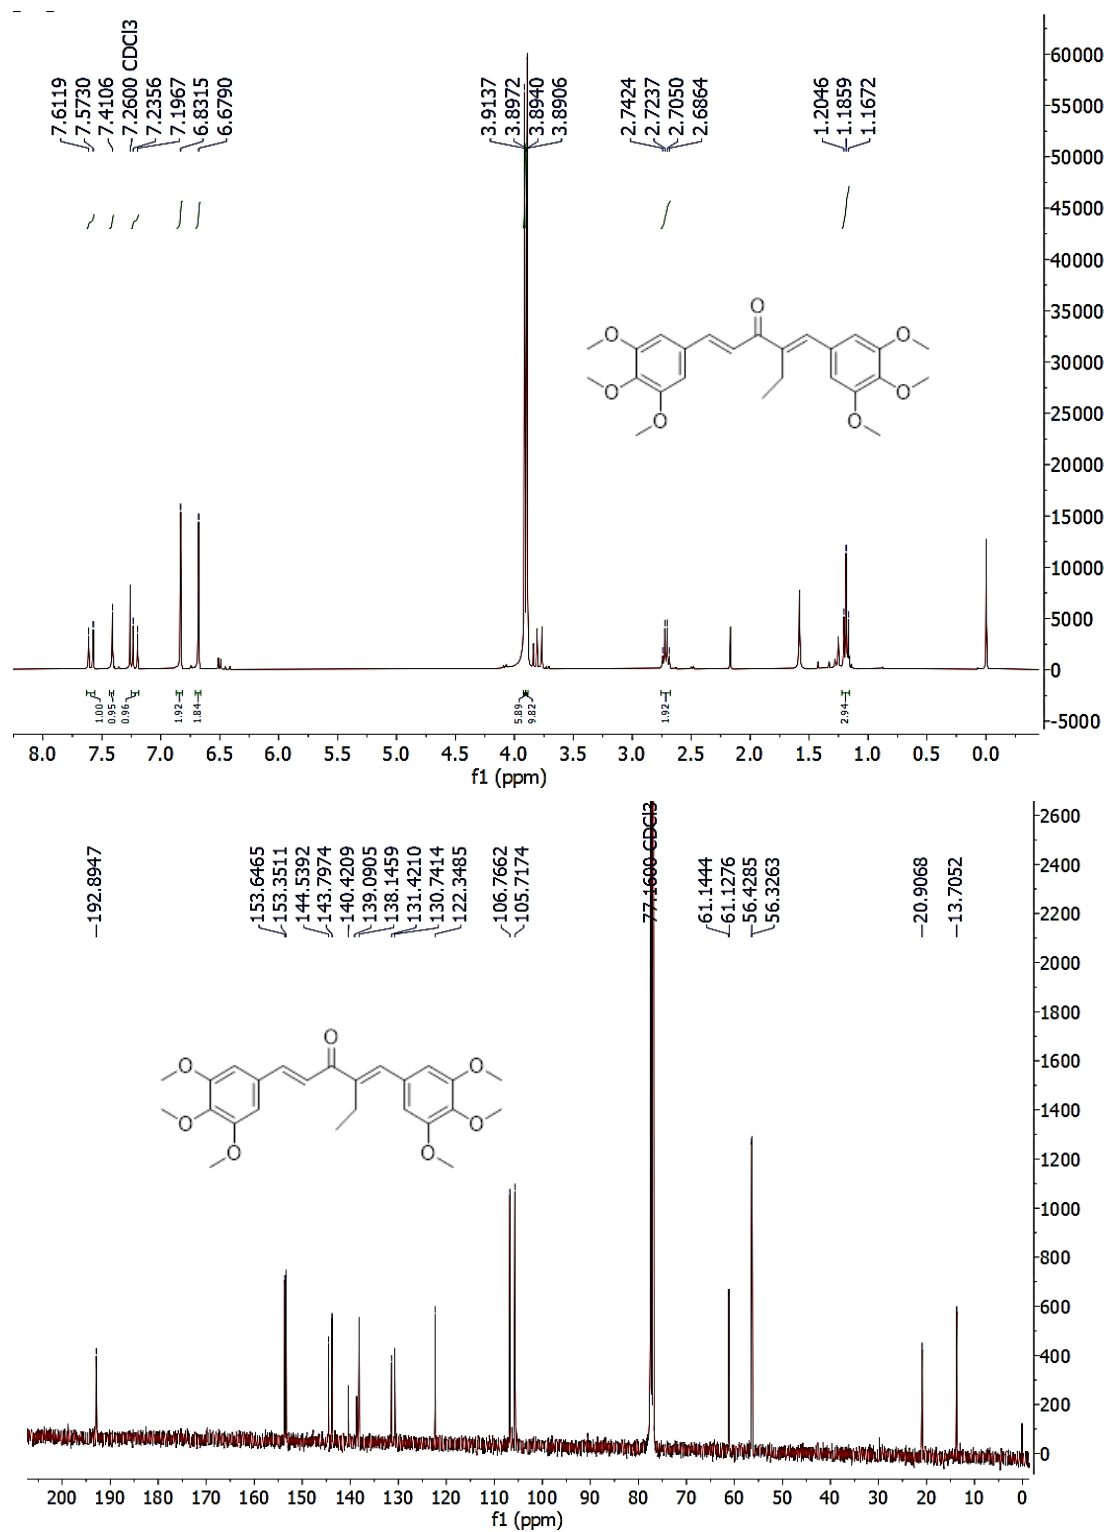

**Figure S12.** <sup>1</sup>H and <sup>13</sup>C NMR spectra of compound 16.

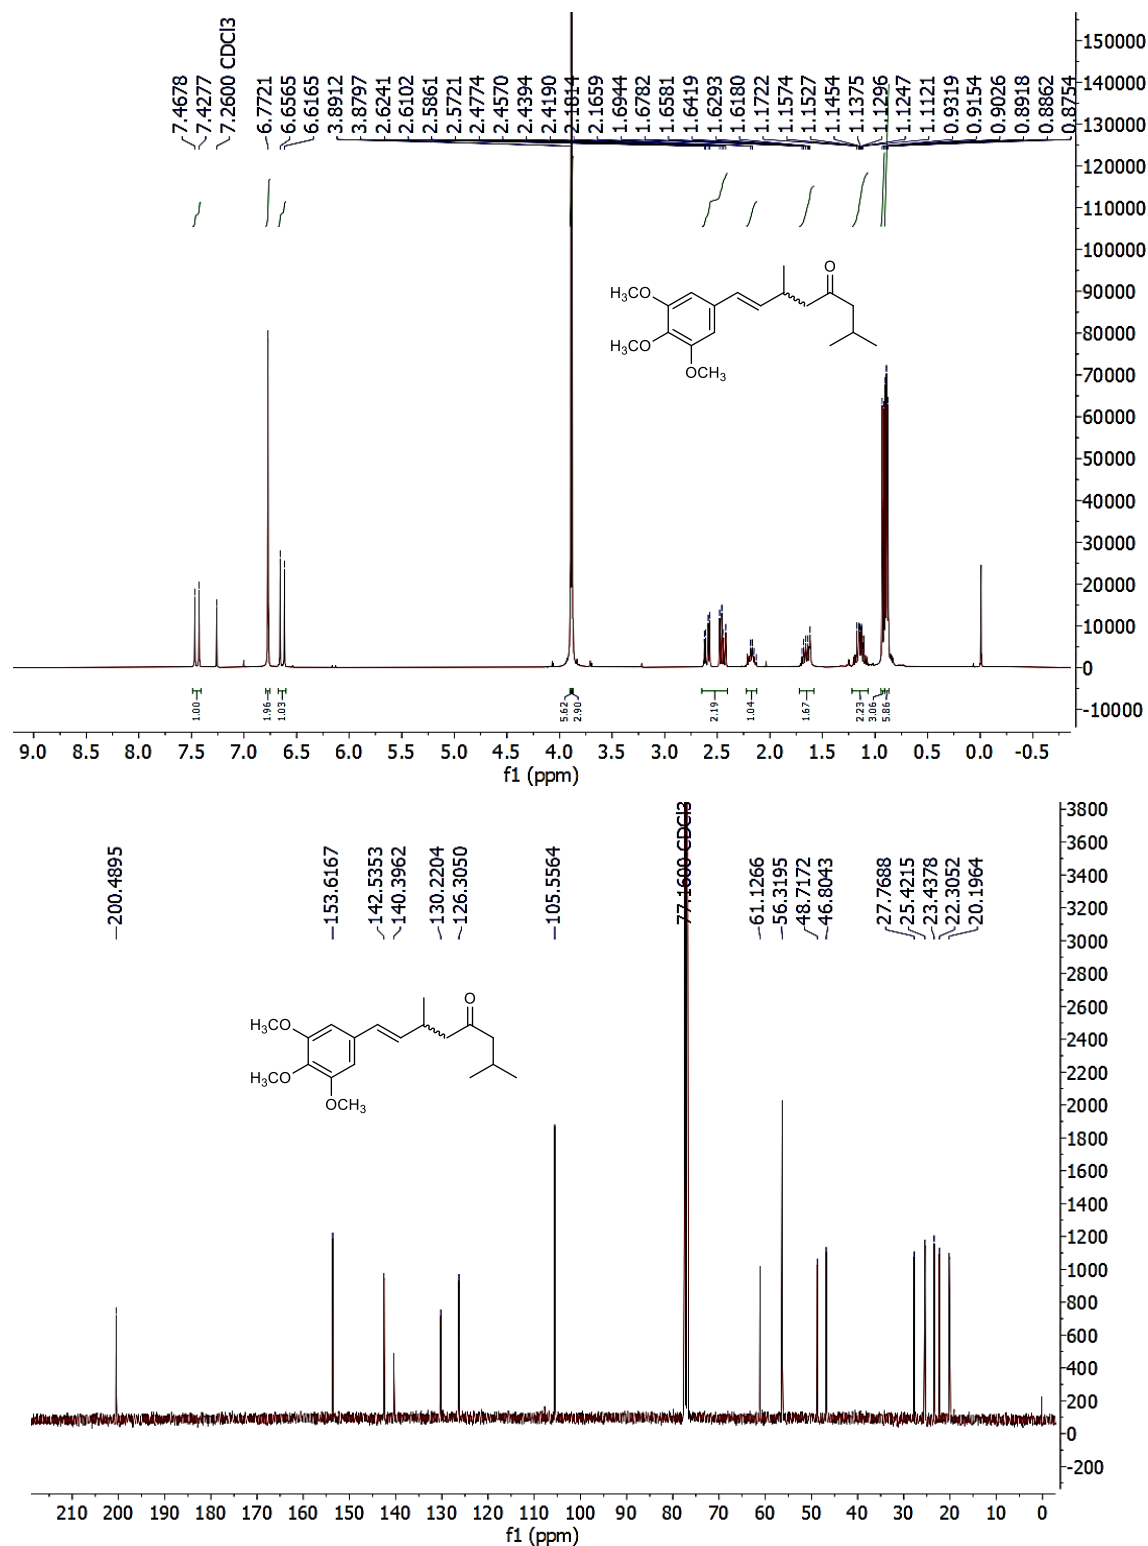

Figure S13. <sup>1</sup>H and <sup>13</sup>C NMR spectra of compound 17.

## HRMS spectra

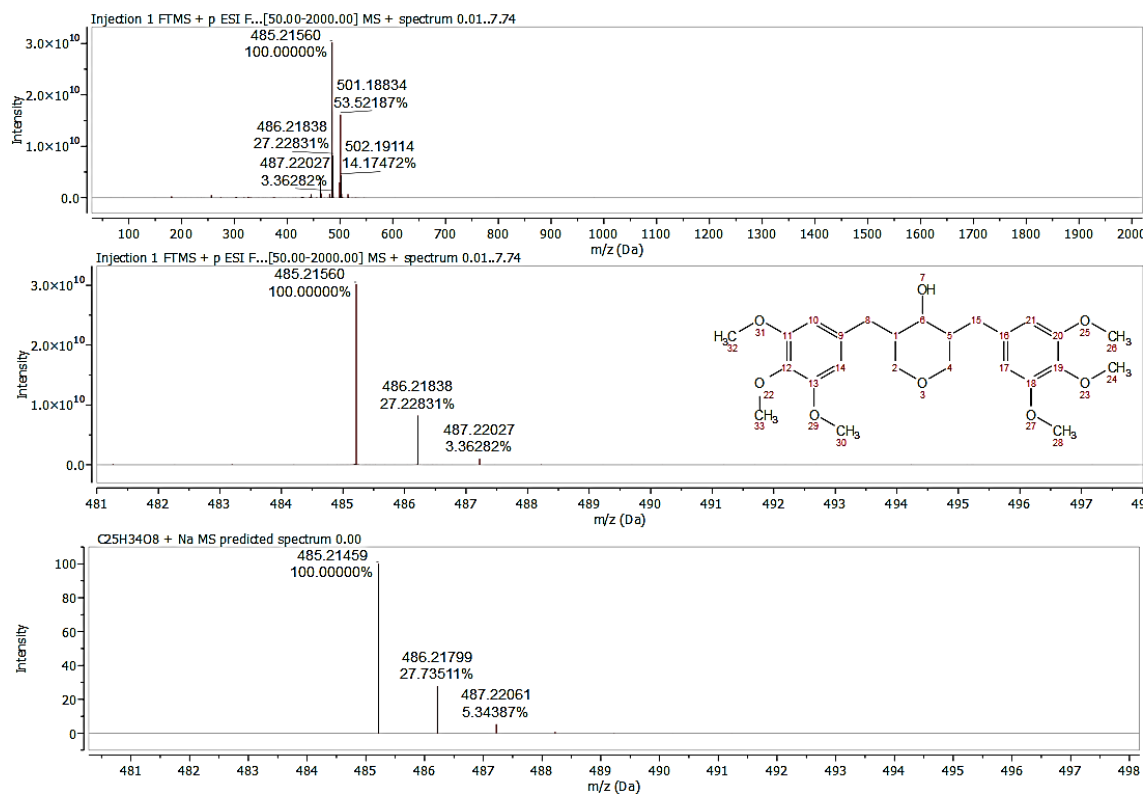

| Meas. m/z | Ion formula                                    | m/z       | Err [ppm] | Err [mDa] |
|-----------|------------------------------------------------|-----------|-----------|-----------|
| 485.21560 | C <sub>25</sub> H <sub>34</sub> O <sub>8</sub> | 485.21459 | -2.08     | -1.01     |

**Figure S14.** HRMS spectrum of compound **10**.

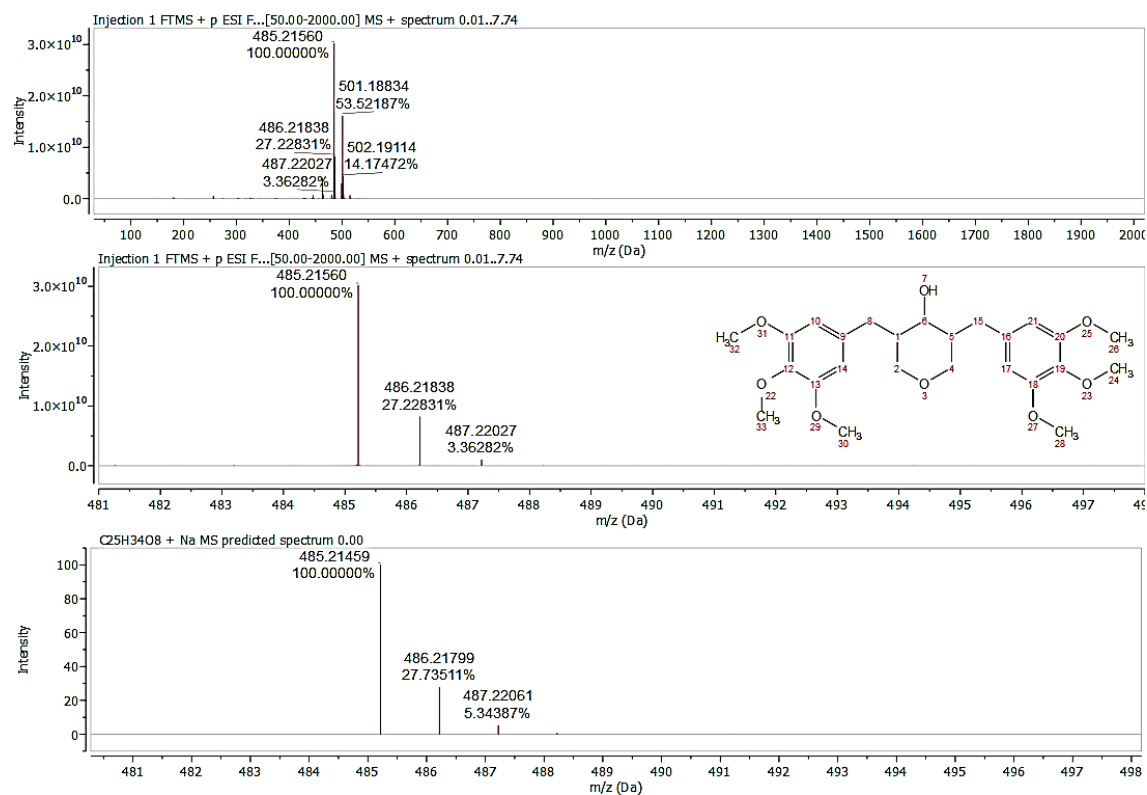

| Meas. m/z | Ion formula                                    | m/z       | Err [ppm] | Err [mDa] |
|-----------|------------------------------------------------|-----------|-----------|-----------|
| 485.21560 | C <sub>25</sub> H <sub>34</sub> O <sub>8</sub> | 485.21459 | -2.08     | -1.01     |

**Figure S15.** HRMS spectrum of compound **11**.

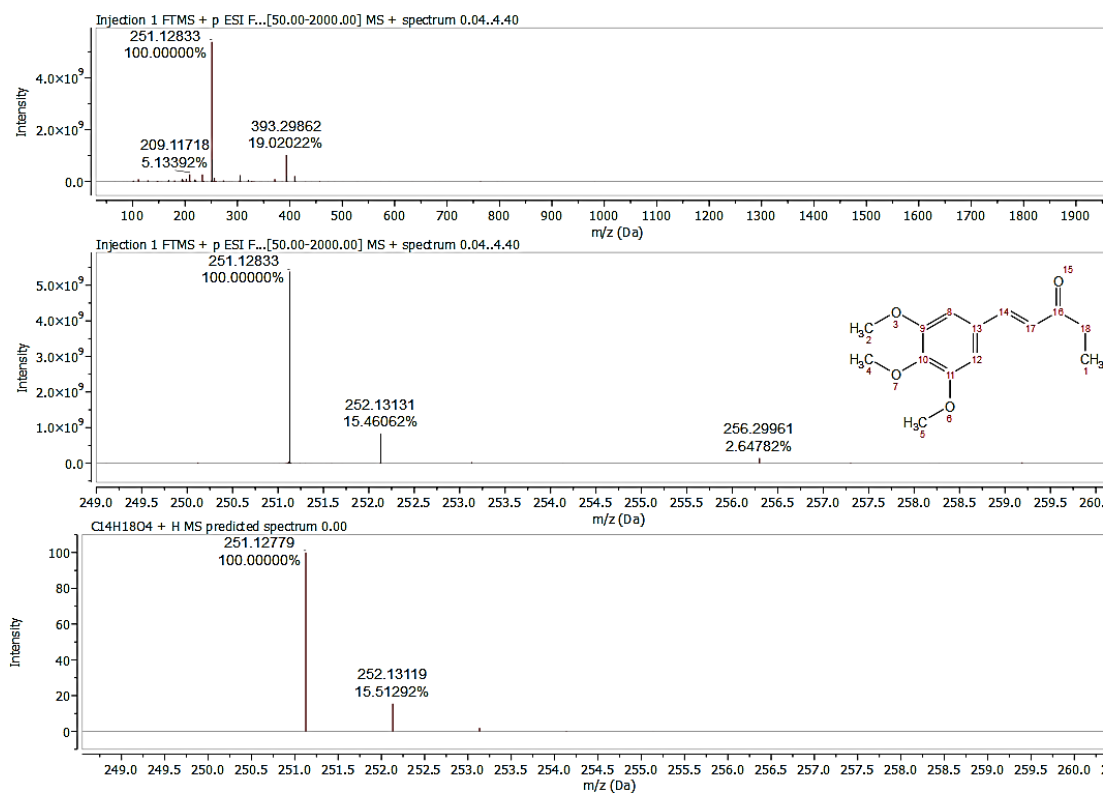

| Meas. m/z | Ion formula                                    | m/z       | Err [ppm] | Err [mDa] |
|-----------|------------------------------------------------|-----------|-----------|-----------|
| 251.12833 | C <sub>14</sub> H <sub>18</sub> O <sub>4</sub> | 251.12779 | -2.16     | -0.54     |

**Figure S16.** HRMS spectrum of compound **12**.

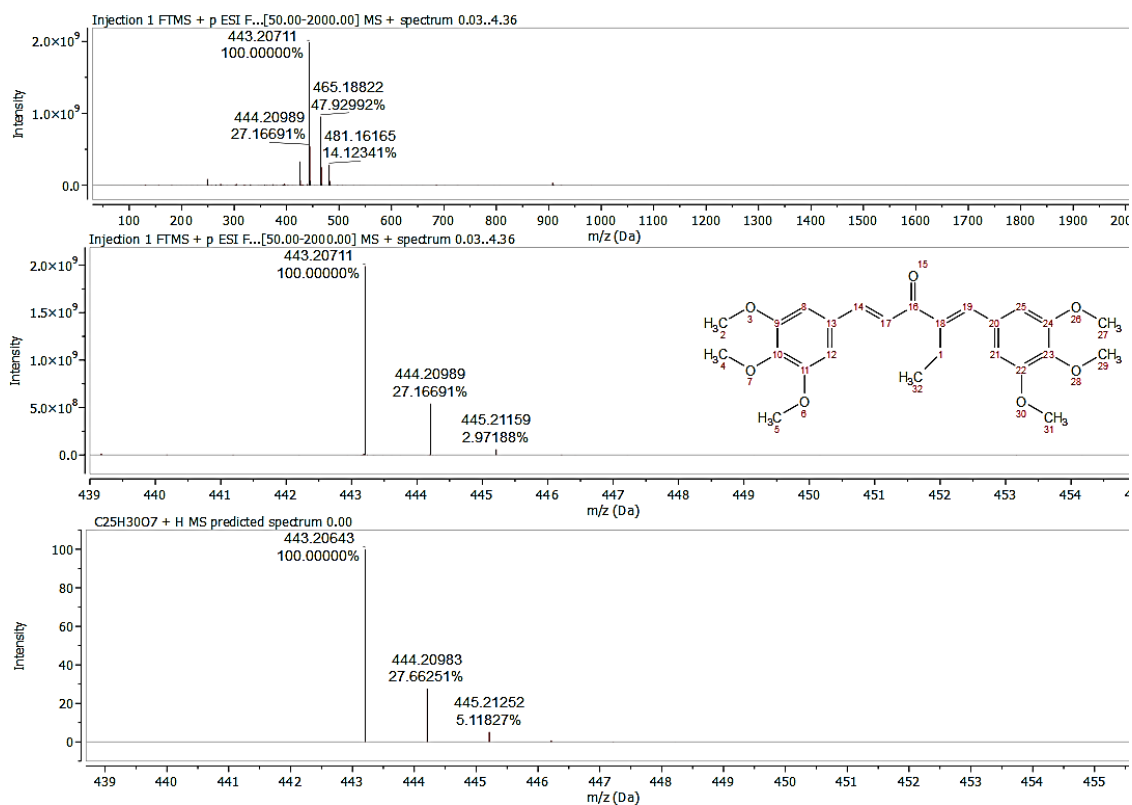

| Meas. m/z | Ion formula                                    | m/z       | Err [ppm] | Err [mDa] |
|-----------|------------------------------------------------|-----------|-----------|-----------|
| 443.20711 | C <sub>25</sub> H <sub>30</sub> O <sub>7</sub> | 443.20643 | -1.53     | -0.68     |

**Figure S17.** HRMS spectrum of compound **13**.

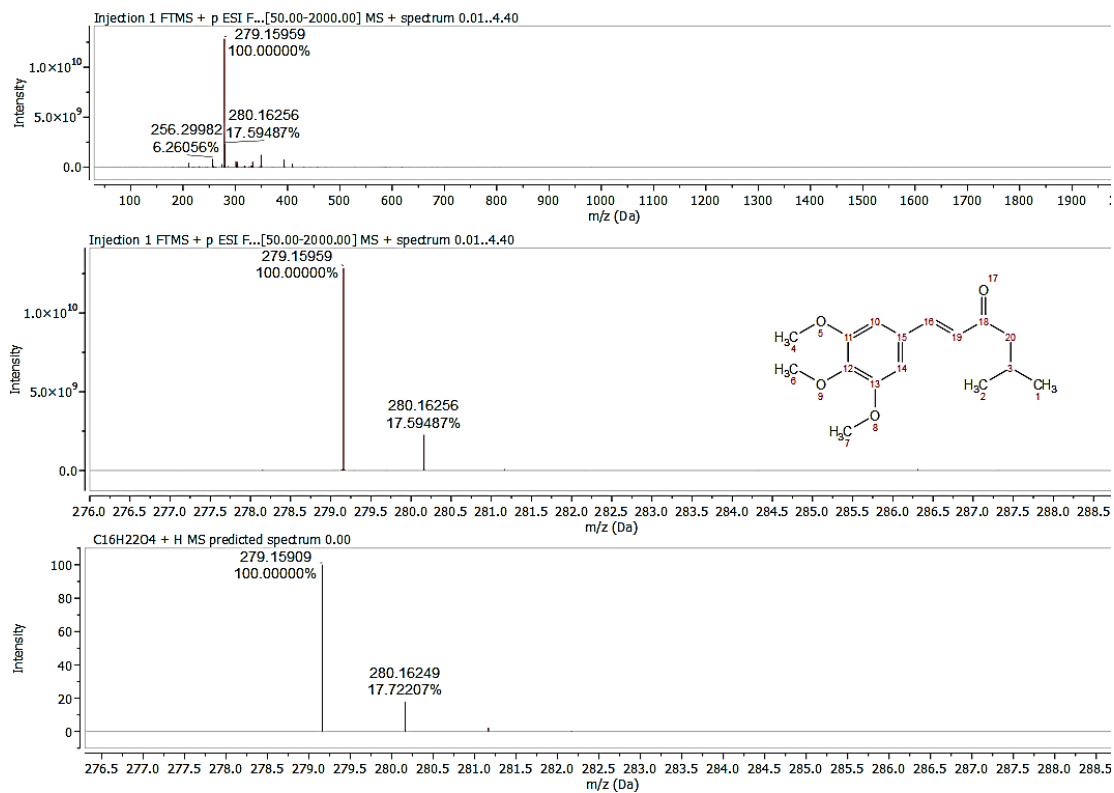

| Meas. m/z | Ion formula                                    | m/z       | Err [ppm] | Err [mDa] |
|-----------|------------------------------------------------|-----------|-----------|-----------|
| 279.15959 | C <sub>16</sub> H <sub>22</sub> O <sub>4</sub> | 279.15909 | -1.80     | -0.50     |

**Figure S18.** HRMS spectrum of compound **14**.



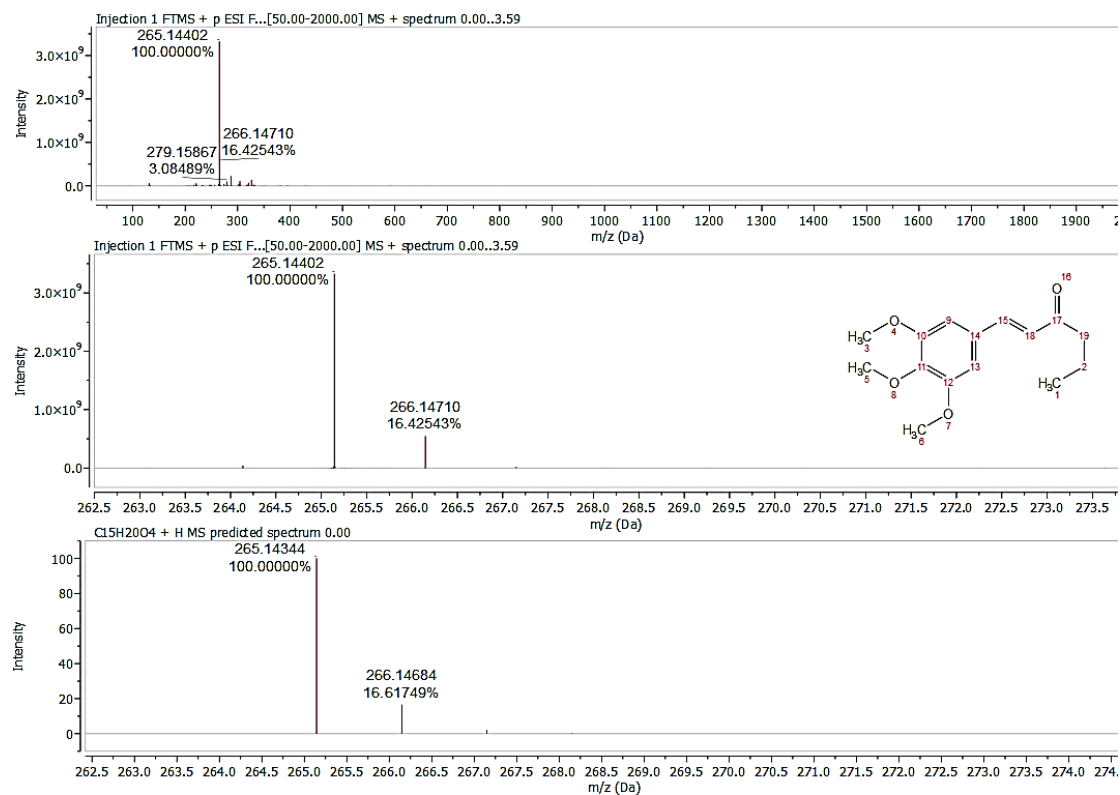

| Meas. m/z | Ion formula                                    | m/z       | Err [ppm] | Err [mDa] |
|-----------|------------------------------------------------|-----------|-----------|-----------|
| 265.14402 | C <sub>15</sub> H <sub>20</sub> O <sub>4</sub> | 265.14402 | -2.20     | -0.58     |

**Figure S19.** HRMS spectrum of compound **15**.

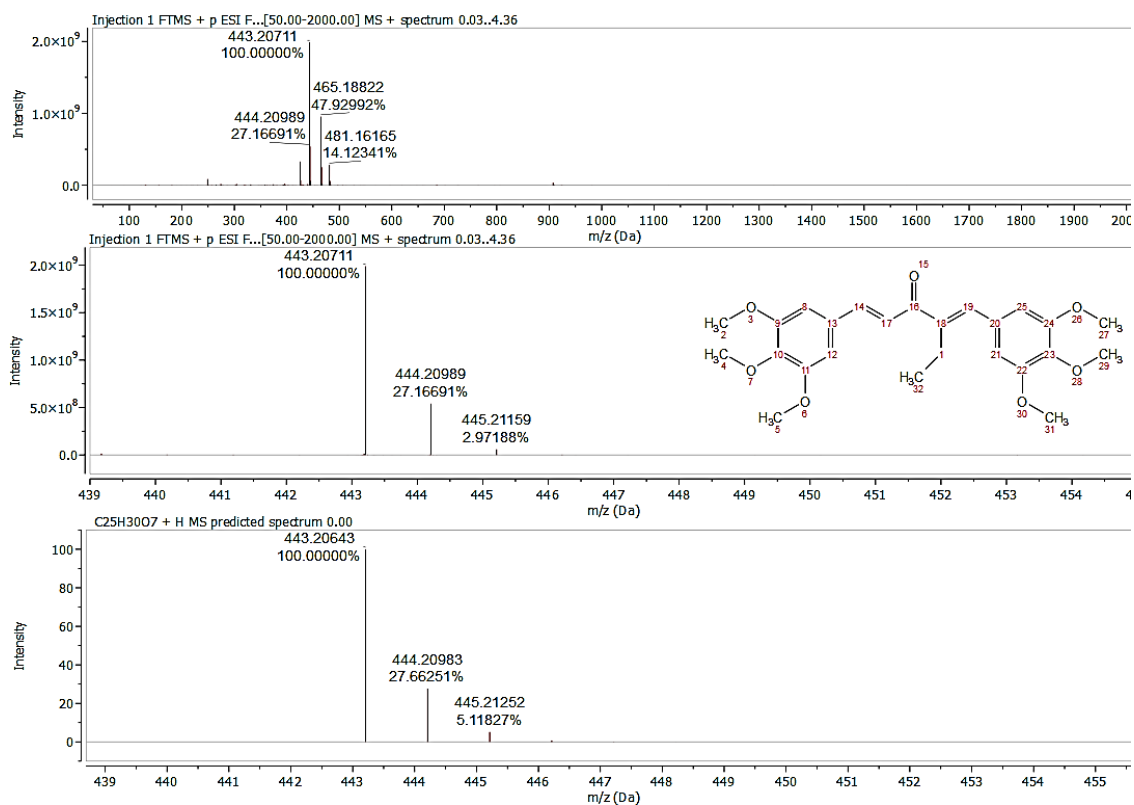

| Meas. m/z | Ion formula                                    | m/z       | Err [ppm] | Err [mDa] |
|-----------|------------------------------------------------|-----------|-----------|-----------|
| 443.20711 | C <sub>25</sub> H <sub>30</sub> O <sub>7</sub> | 443.20643 | -1.53     | -0.68     |

**Figure S20.** HRMS spectrum of compound **16**.

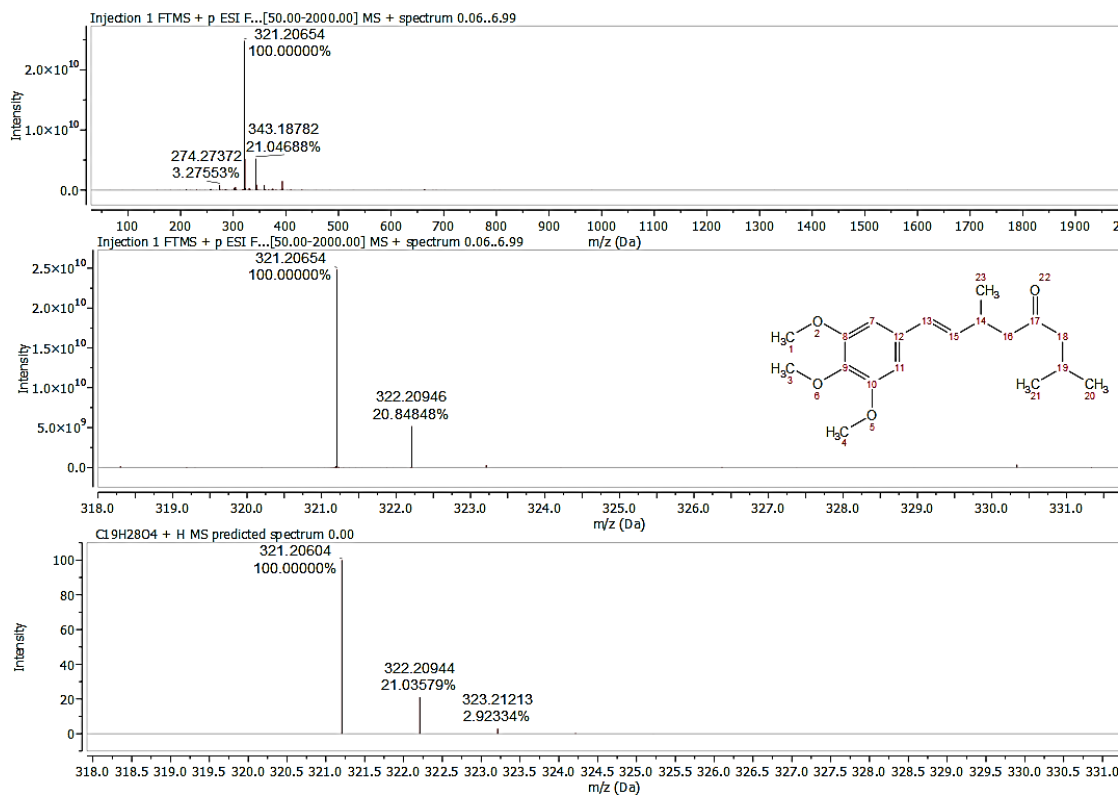

| Meas. m/z | Ion formula                                    | m/z       | Err [ppm] | Err [mDa] |
|-----------|------------------------------------------------|-----------|-----------|-----------|
| 321.20654 | C <sub>19</sub> H <sub>28</sub> O <sub>4</sub> | 321.20604 | -1.57     | -0.50     |

**Figure S21.** HRMS spectrum of compound **17**.

## HPLC chromatograms

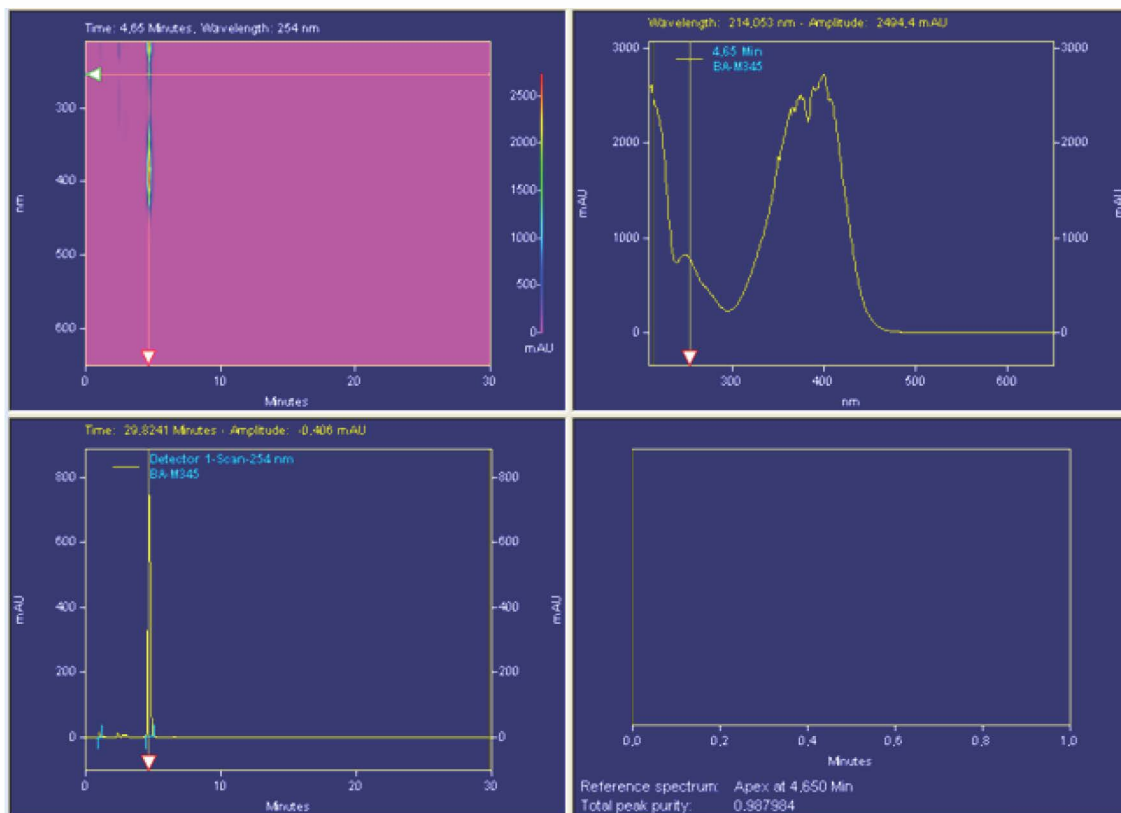

| Retention Time | Area     | Area % | Height | Height % |
|----------------|----------|--------|--------|----------|
| 1.017          | 47698    | 0.45   | 17153  | 2.14     |
| 4.650          | 10511125 | 99.55  | 783993 | 97.86    |
| Totals         | 1.017    | 47698  | 0.45   | 17153    |

**Figure S22.** HPLC chromatograms of compound **6**.

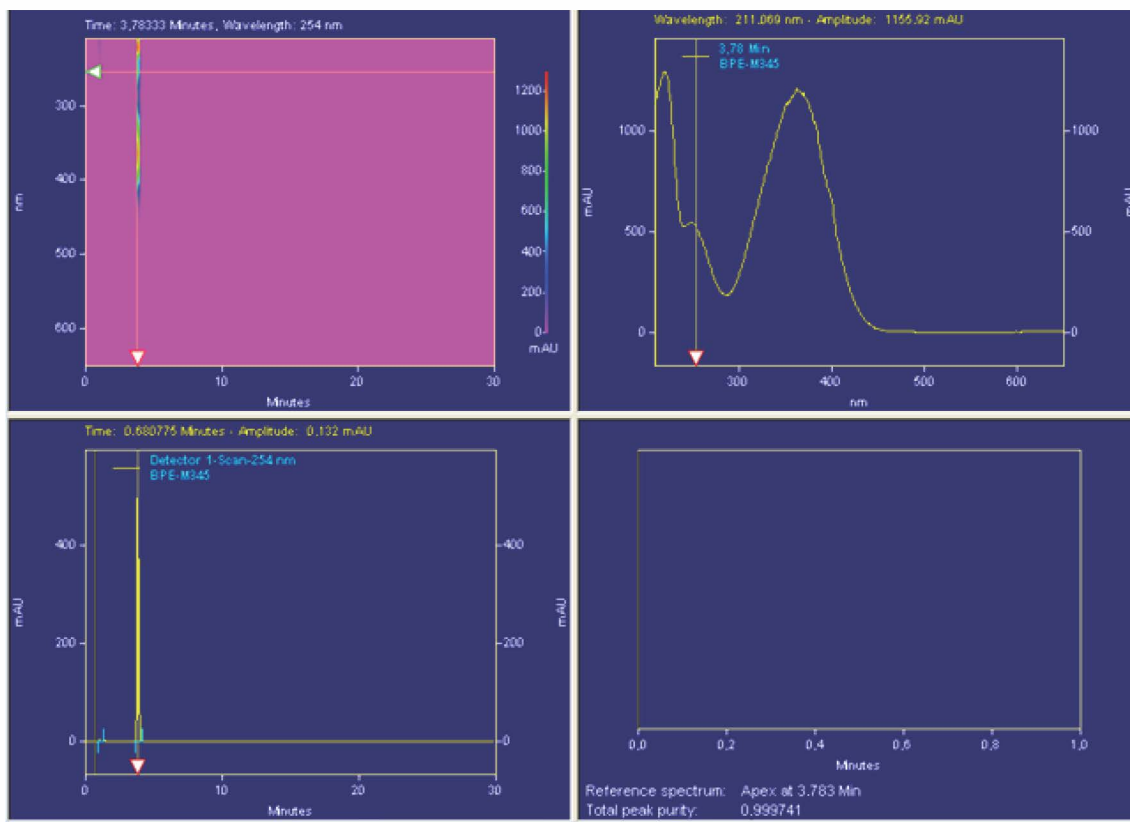

| Retention Time | Area    | Area % | Height | Height % |
|----------------|---------|--------|--------|----------|
| 0.983          | 23362   | 0.41   | 6624   | 1.24     |
| 3.783          | 5716778 | 99.59  | 526936 | 98.76    |
| Totals         | 5740140 | 100.00 | 533560 | 100.00   |

**Figure S23.** HPLC chromatograms of compound **7**.

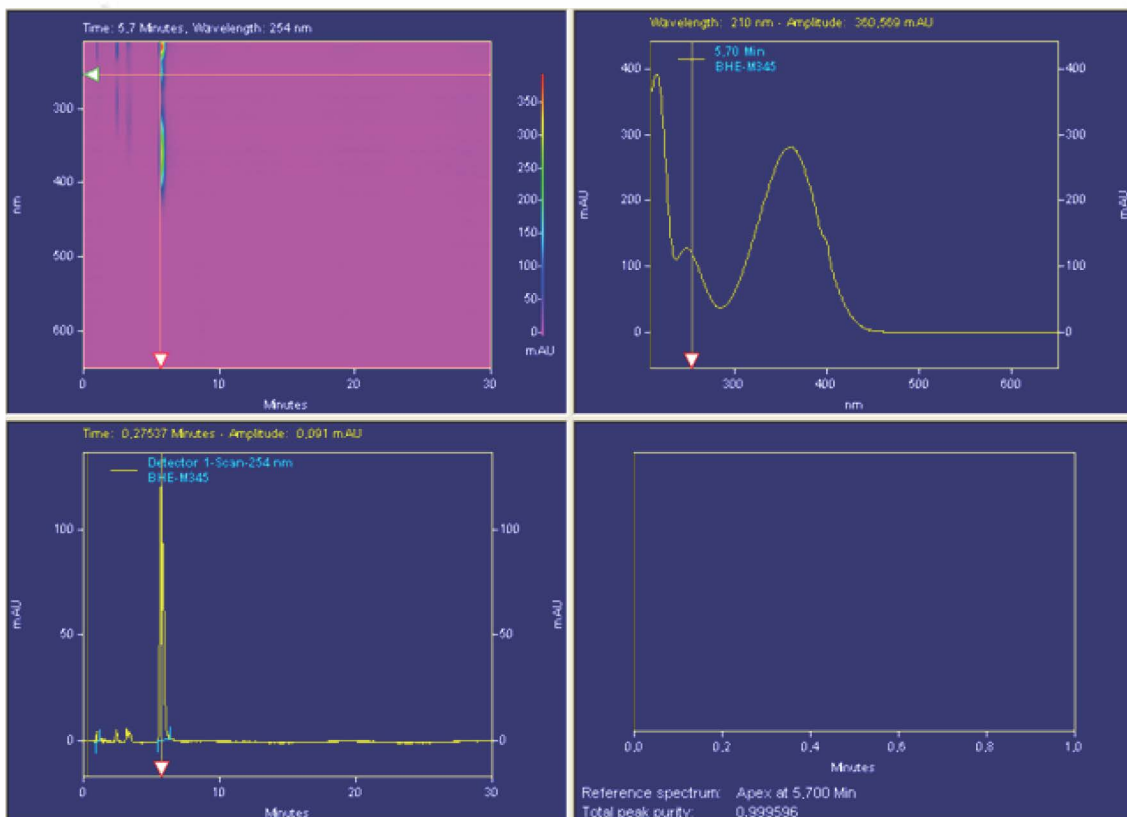

| Retention Time | Area    | Area % | Height | Height % |
|----------------|---------|--------|--------|----------|
| 0.967          | 21613   | 1.03   | 5243   | 4.17     |
| 5.700          | 2069200 | 98.97  | 120581 | 95.83    |
| Totals         | 2090813 | 100.00 | 125824 | 100.00   |

**Figure S24.** HPLC chromatograms of compound **8**.

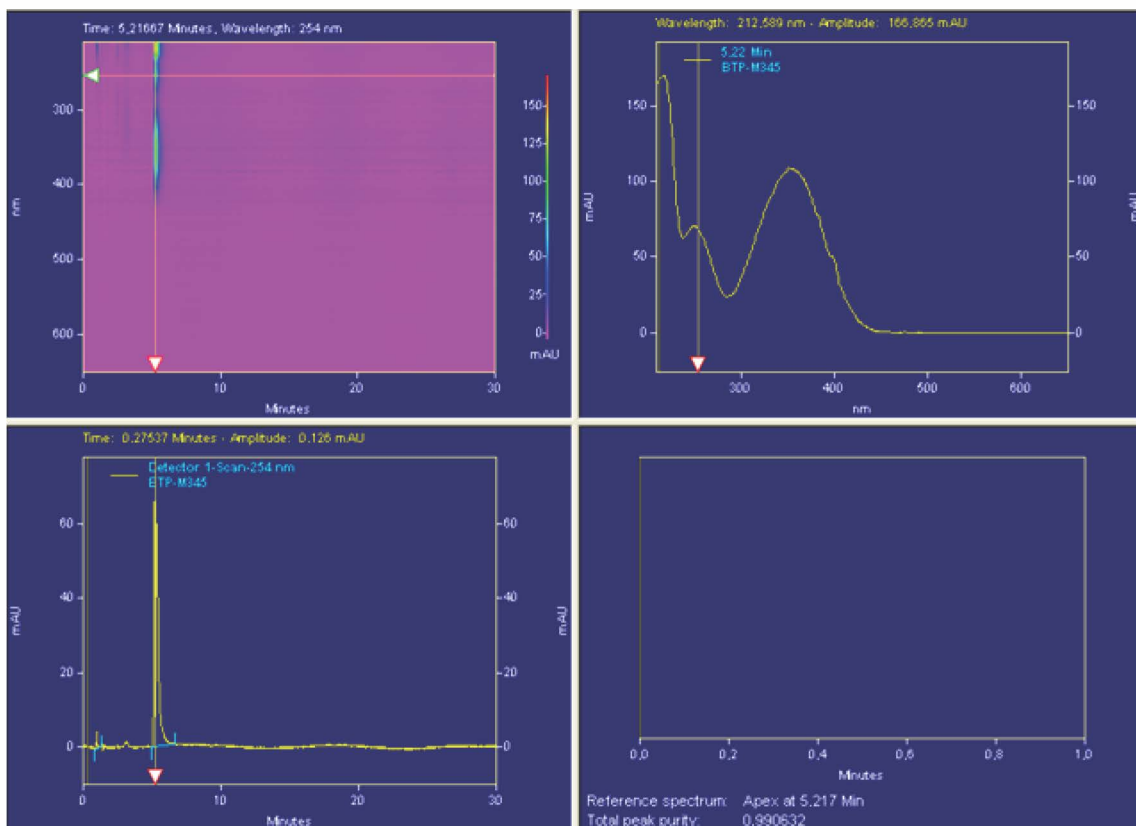

| Retention Time | Area    | Area % | Height | Height % |
|----------------|---------|--------|--------|----------|
| 0.967          | 20869   | 1.51   | 4685   | 6.35     |
| 5.217          | 1362960 | 98.49  | 69143  | 93.65    |
| Totals         | 1383829 | 100.00 | 73828  | 100.00   |

**Figure S25.** HPLC chromatograms of compound **9**.

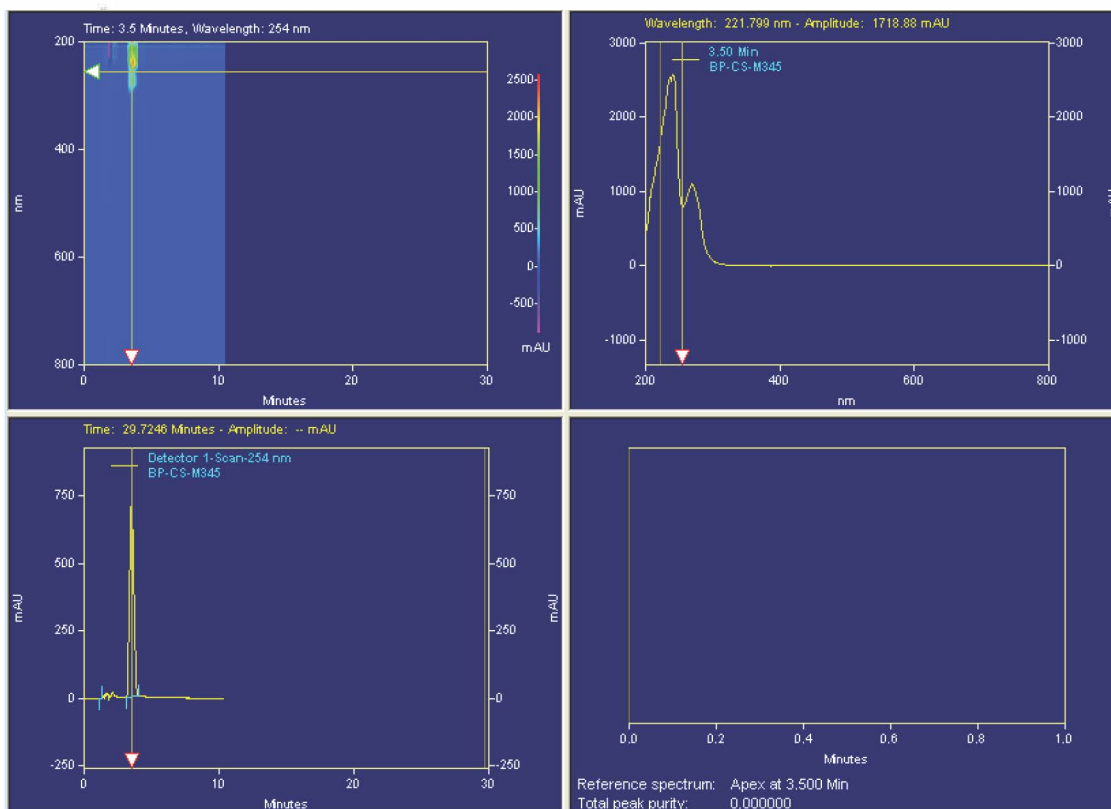

| Retention Time | Area     | Area % | Height | Height % |
|----------------|----------|--------|--------|----------|
| 1.217          | 5302     | 0.03   | 905    | 0.11     |
| 3.500          | 16369382 | 99.97  | 803807 | 99.89    |
| Totals         | 16374684 | 100.00 | 804712 | 100.00   |

**Figure S26.** HPLC chromatograms of compound 10.



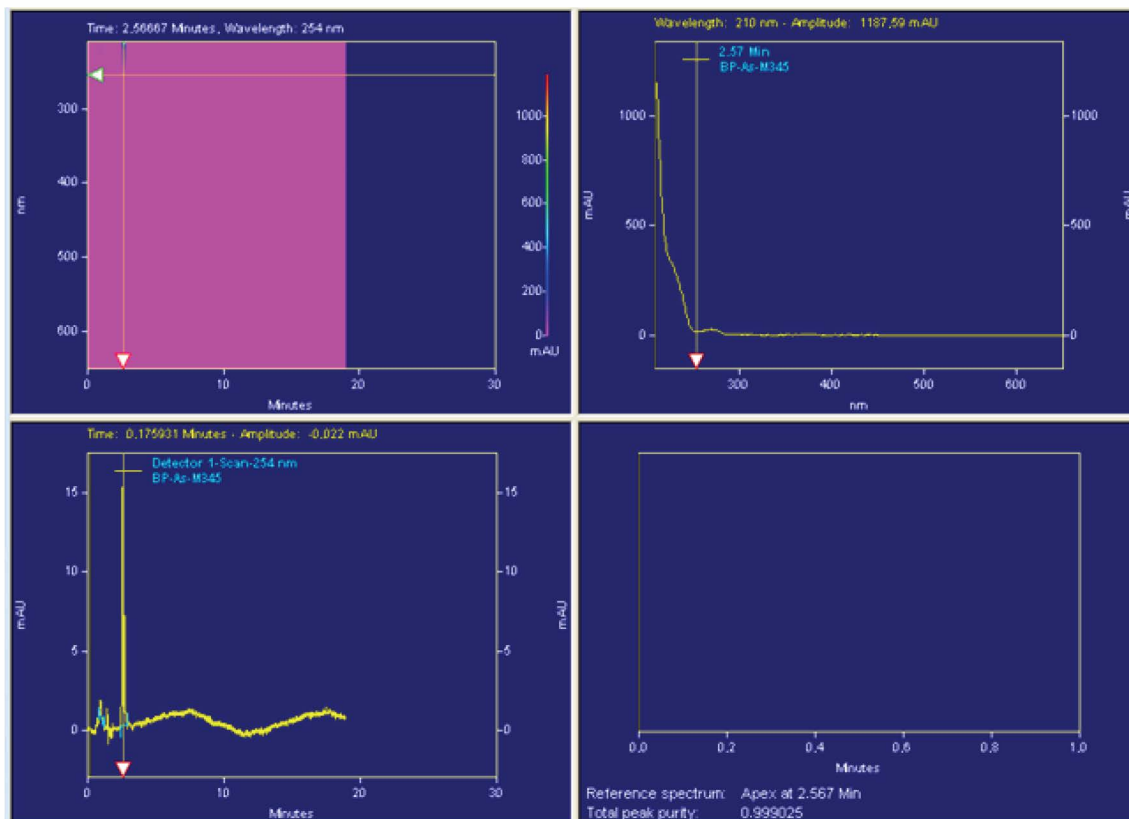

| Retention Time | Area   | Area % | Height | Height % |
|----------------|--------|--------|--------|----------|
| 0.933          | 6986   | 4.56   | 888    | 5.50     |
| 2.567          | 146350 | 95.44  | 15248  | 94.50    |
| Totals         | 153336 | 100.00 | 16136  | 100.00   |

**Figure S27.** HPLC chromatograms of compound 11.

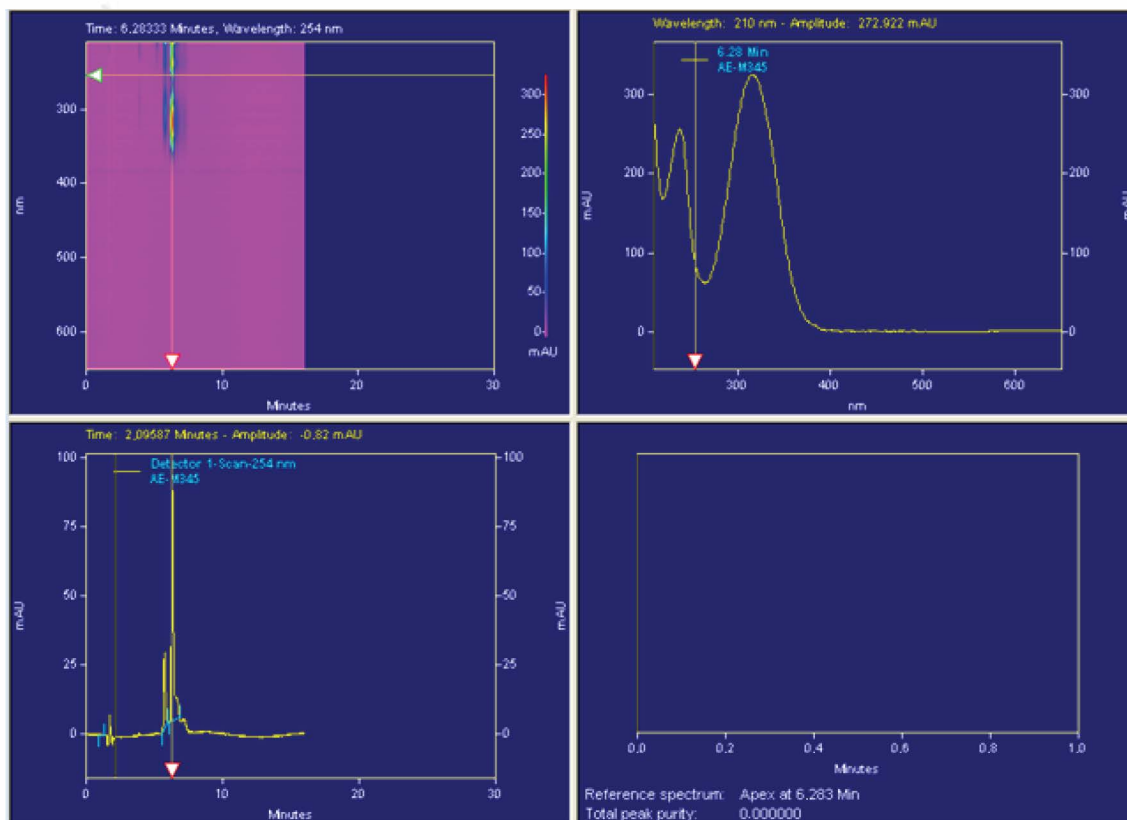

| Retention Time | Area    | Area % | Height | Height % |
|----------------|---------|--------|--------|----------|
| 1.033          | 4002    | 0.32   | 323    | 0.29     |
| 6.283          | 1237422 | 99.68  | 111914 | 99.71    |
| Totals         | 1241424 | 100.00 | 112237 | 100.00   |

**Figure S28.** HPLC chromatograms of compound 12.

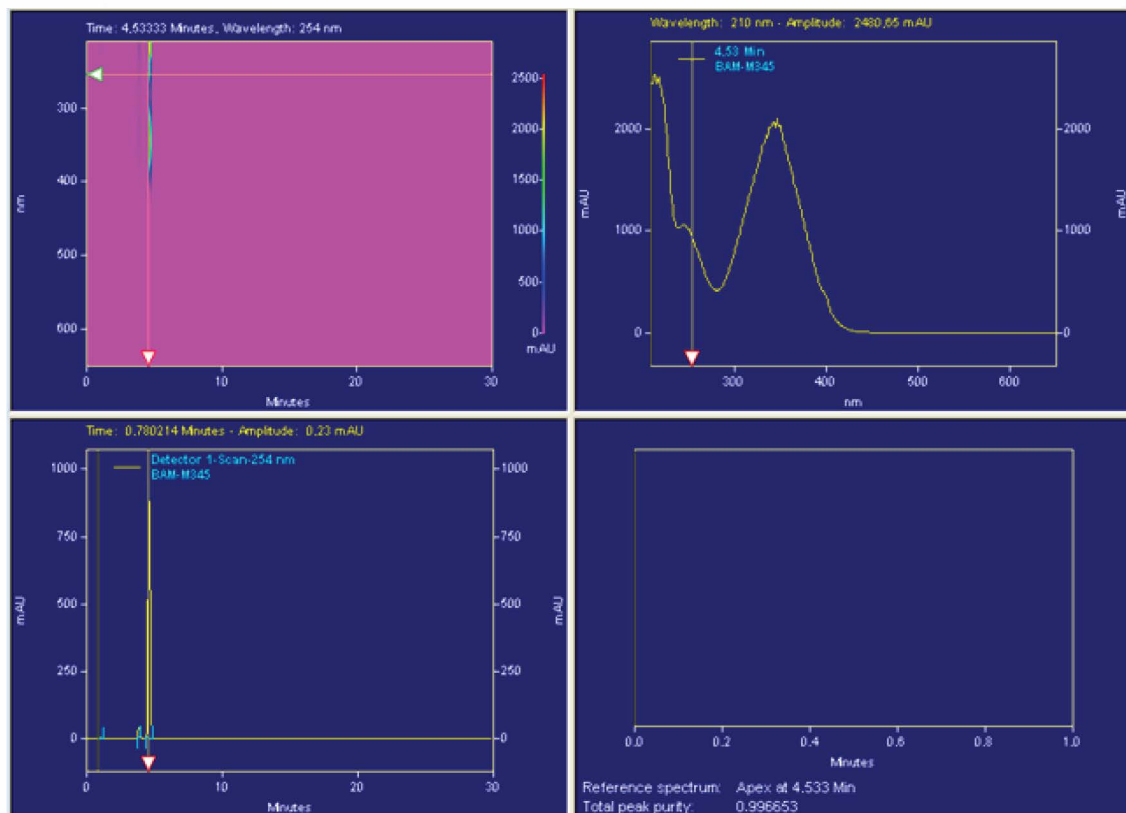

| Retention Time | Area     | Area % | Height | Height % |
|----------------|----------|--------|--------|----------|
| 0.950          | 18713    | 0.15   | 4596   | 0.47     |
| 3.800          | 326562   | 2.64   | 34631  | 3.51     |
| 4.533          | 12025722 | 97.21  | 947850 | 96.03    |
| Totals         | 12370997 | 100.00 | 987077 | 100.00   |

**Figure S29.** HPLC chromatograms of compound 13.

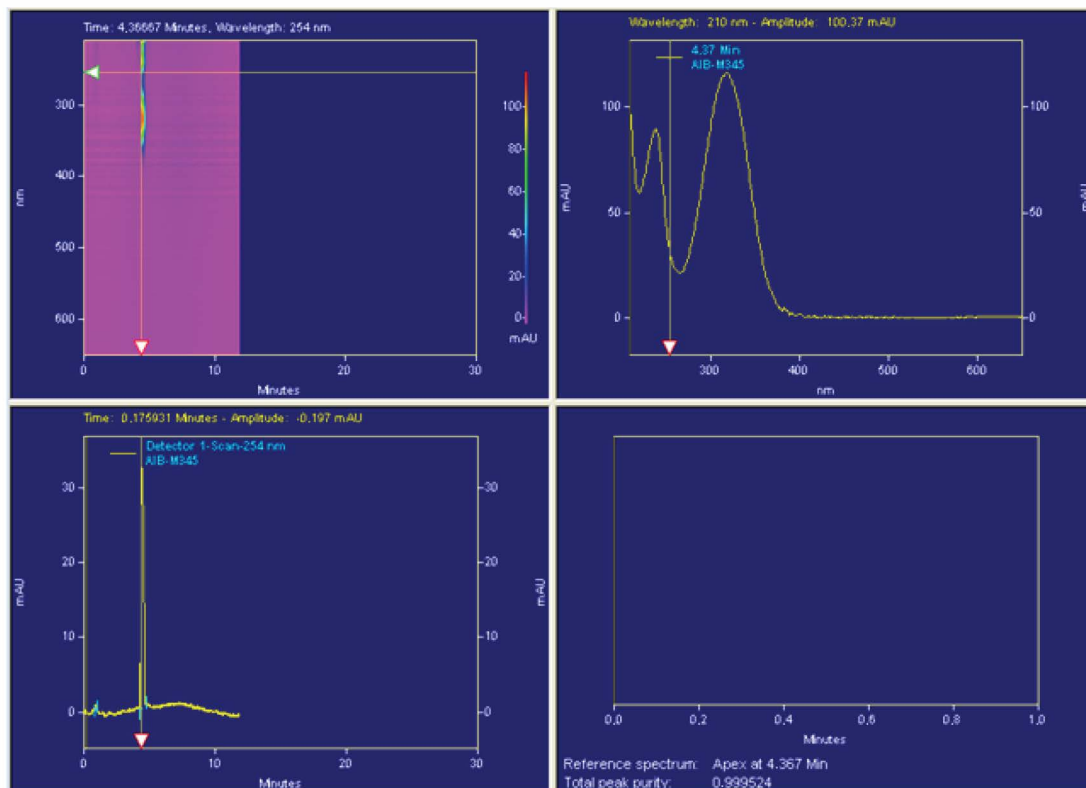

| Retention Time | Area   | Area % | Height | Height % |
|----------------|--------|--------|--------|----------|
| 0.900          | 2301   | 0.47   | 403    | 1.23     |
| 4.367          | 490186 | 99.53  | 32268  | 98.77    |
| Totals         | 492487 | 100.00 | 32671  | 100.00   |

**Figure S30.** HPLC chromatograms of compound **14**.

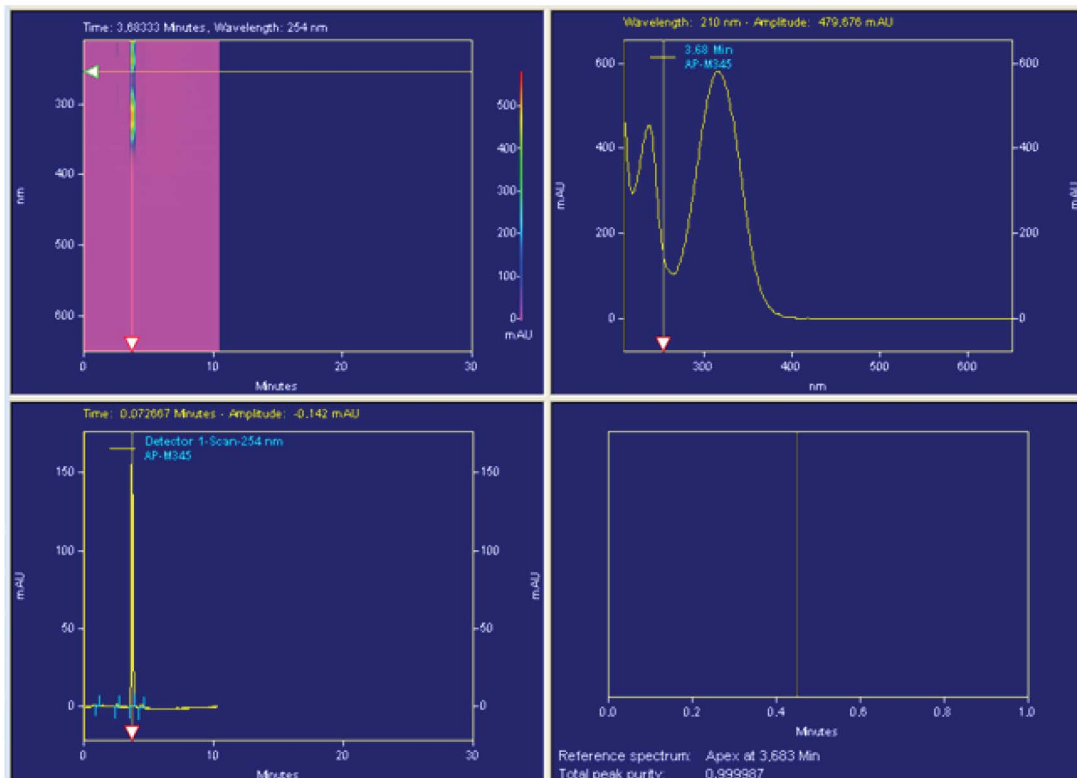

| Retention Time | Area    | Area % | Height | Height % |
|----------------|---------|--------|--------|----------|
| 0.883          | 3137    | 0.15   | 375    | 0.23     |
| 2.517          | 14648   | 0.72   | 1683   | 1.05     |
| 3.683          | 1997569 | 97.84  | 156372 | 97.55    |
| 4.400          | 26335   | 1.29   | 1870   | 1.17     |
| Totals         | 2041689 | 100.00 | 160300 | 100.00   |

**Figure S31.** HPLC chromatograms of compound 15.

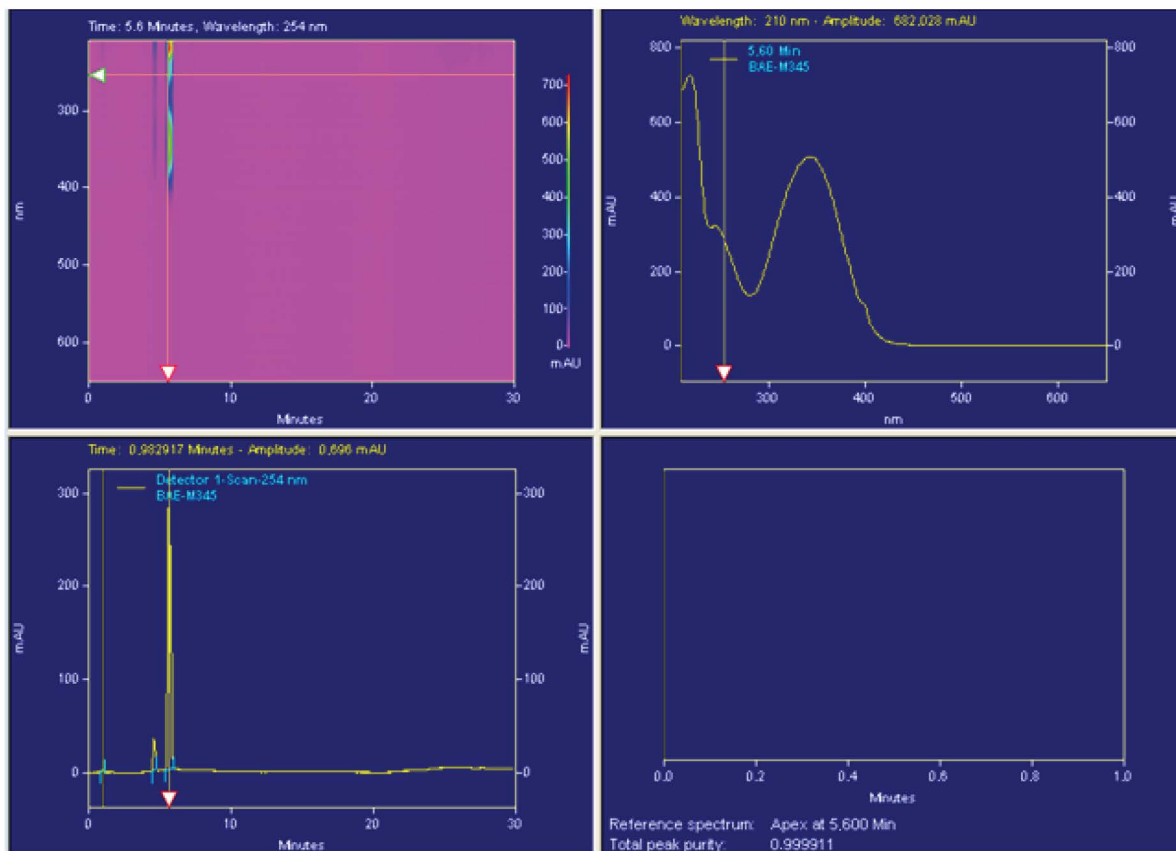

| Retention Time | Area    | Area % | Height | Height % |
|----------------|---------|--------|--------|----------|
| 0.917          | 9773    | 0.20   | 1827   | 0.57     |
| 4.550          | 206343  | 4.22   | 16991  | 5.28     |
| 5.600          | 4670834 | 95.58  | 302936 | 94.09    |
| Totals         | 4886950 | 100.00 | 321754 | 100.00   |

**Figure S32.** HPLC chromatograms of compound **16**.

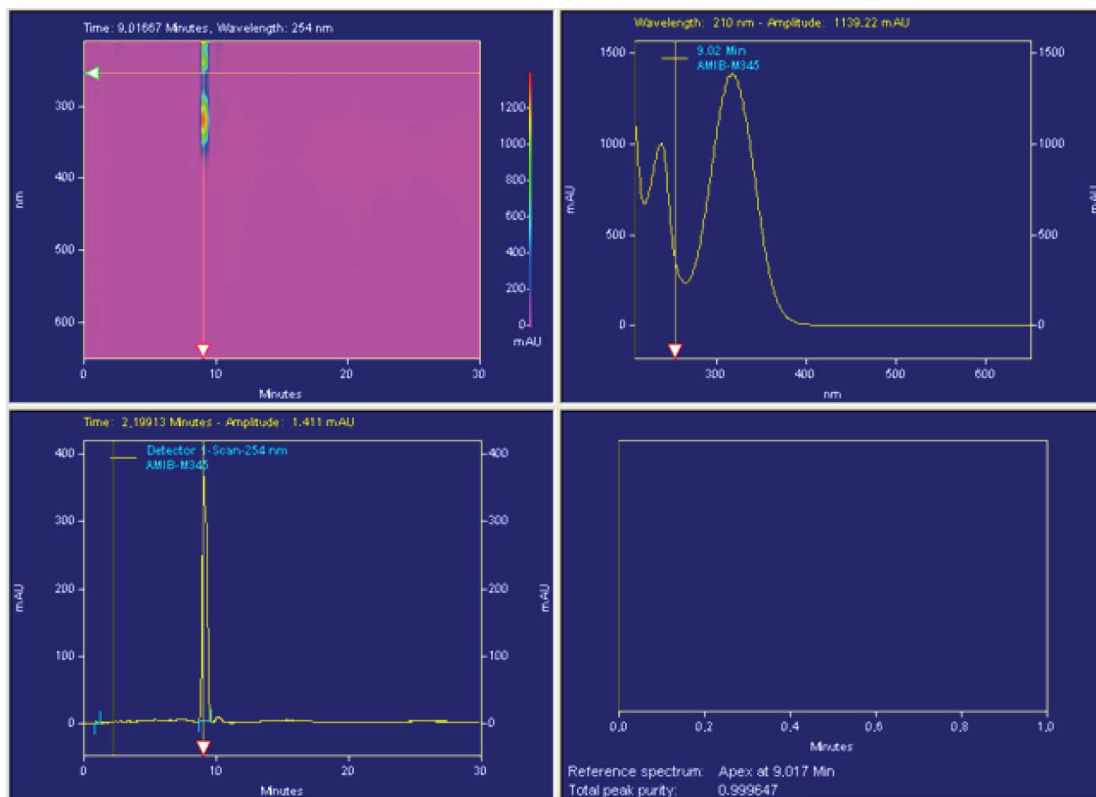

| Retention Time | Area    | Area % | Height | Height % |
|----------------|---------|--------|--------|----------|
| 0.933          | 15505   | 0.17   | 3237   | 0.87     |
| 9.017          | 9133883 | 99.83  | 369124 | 99.13    |
| Totals         | 9149388 | 100.00 | 372361 | 100.00   |

**Figure S33.** HPLC chromatograms of compound **17**.
